# Supplementary material
Source: PubMed Central journal article supplement (PMC8214705)
Supplement: pnas.2103779118.sapp.pdf [file pnas.2103779118.sapp.pdf]

1

## 2 **Supplementary Information for**

3 **Supporting Information for: Unifying deterministic and stochastic ecological dynamics via a**  
4 **landscape-flux approach**

5 **Li Xu, Denis Patterson, Ann Carla Staver, Simon Asher Levin\* and Jin Wang\***

6 **\* E-mail: [slevin@princeton.edu](mailto:slevin@princeton.edu), [jin.wang.1@stonybrook.edu](mailto:jin.wang.1@stonybrook.edu)**

### 7 **This PDF file includes:**

- 8     Supplementary text
- 9     Figs. S1 to S44 (not allowed for Brief Reports)
- 10    Table S1 (not allowed for Brief Reports)
- 11    SI References

12 **Supporting Information Text**

13 Table S1 below summarizes the mathematical definitions and notation used throughout the paper.

**Table S1. Mathematical Variables**

| Symbol                      | Interpretation                                              |
|-----------------------------|-------------------------------------------------------------|
| $\mathbf{x}$                | system state                                                |
| $\mathbf{F}(\mathbf{x})$    | driving force                                               |
| $D$                         | scale factor representing the magnitude of the fluctuations |
| $\mathbf{G}$                | diffusion matrix                                            |
| $P(\mathbf{x}, t)$          | probability of system state $\mathbf{x}$ at time $t$        |
| $\mathbf{J}(\mathbf{x}, t)$ | probability flux                                            |
| $J_{ss}$                    | probability flux of steady state                            |
| $U(\mathbf{x})$             | population potential landscape                              |
| $\phi_0$                    | intrinsic potential landscape                               |
| $\mathbf{V}$                | intrinsic flux velocity                                     |
| $L(\mathbf{x})$             | Lagrangian                                                  |
| $\mathcal{F}$               | intrinsic free energy                                       |
| $\mathcal{Z}$               | partition function                                          |

14 **Remark**

15 The Fokker-Planck equation for the evolution of the probability density and the corresponding Langevin equation for the  
 16 evolution of the stochastic trajectories are usually mathematically equivalent in terms of the statistics(1–3). However, in  
 17 practice, the diffusion equation cannot always be used to deal with dimensions more than four due to memory issues, while the  
 18 Langevin trajectory method can more easily explore higher dimensions. This is due to the fact that stochastic Langevin method  
 19 only samples the higher probability states, thus saving computational times when exploring the state space. We use both of  
 20 these methods according to their convenience and computational cost. For example, the steady state probability density result  
 21 can be readily obtained from the Fokker-Planck equation in low dimensions, while the distribution of kinetic times and the  
 22 variances of the frequencies for the Savanna state (resp. Forest state) can be directly calculated from the Langevin trajectories.

23 **1. Ecological behavior as a function of the sapling birth rate  $\beta$ .** The dominant population path is the path of transition from  
 24 one stable state to the other with the largest probability and can thus be used to understand *Savanna to Forest* or *Forest to*  
 25 *Savanna* transitions in the SL model. The dominant population path probability can in turn be quantified by the population  
 26 action  $A_{po}(\mathbf{x})$ , as shown in Figure S1A.  $A_{poFS}$  denotes the action of the dominant population path from *Forest to Savanna* and  
 27  $A_{poSF}$  denotes the action of the dominant population path from *Savanna to Forest*. Higher action denotes lower dominant  
 28 population path probability since the dominant population path probability is proportional to  $\exp[-A(\mathbf{x})]$ . As expected,  
 29 we observe that  $A_{poFS}$  increases and  $A_{poSF}$  decreases with increasing  $\beta$ . Figure S1D shows the logarithm of the dominant  
 30 population path probability from *Forest to Savanna* divided by that of the dominant population path from *Savanna to Forest*  
 31 decreases as  $\beta$  becomes bigger. Thus *Savanna* becomes less stable while *Forest* becomes more stable as  $\beta$  increase. Thus, it  
 32 becomes harder to switch from *Forest to Savanna*, while it becomes easier to switch from *Savanna to Forest*. We also show that  
 33 the action of the dominant population path versus  $\mu, \theta_1$  in Figure S1.

34 Figure S2 shows the intrinsic potential landscape  $\phi_0$  for increasing  $\beta$  overlaid with the intrinsic flux velocity (purple arrows)  
 35 and the negative gradient of the intrinsic potential landscape  $-\nabla\phi_0$  (white arrows), as well as the intrinsic paths (thick  
 36 red/white lines). Once more, as expected, we observe a shift from *Savanna to Forest* dominance as  $\beta$  increases. The dominant  
 37 intrinsic path from *Savanna to Forest*, and the dominant intrinsic path from *Forest to Savanna* are distinct. The irreversibility  
 38 of the dominant intrinsic paths is due to the presence of the nonequilibrium rotational flux and the two intrinsic dominant  
 39 intrinsic paths both pass through the saddle point (the black dot) which shows that the dominant intrinsic paths must pass  
 40 through the saddle point under zero fluctuations. In the zero fluctuation limit, the force can be decomposed into a gradient  
 41 term and a curl term:  $\mathbf{F} = -\mathbf{G} \cdot \nabla\phi_0 + \mathbf{V}$ . Hence the two components of the driving force for the ecological system are the  
 42 negative gradient of the intrinsic potential landscape  $-\nabla\phi_0$  (white arrows) and the intrinsic steady-state flux velocity  $\mathbf{V}$  (purple  
 43 arrows). The intrinsic flux (purple arrows) and the negative gradient of the intrinsic potential landscape ( $-\nabla\phi_0$ )(white arrows)  
 44 are perpendicular to each other because  $\mathbf{V} \cdot \nabla\phi_0 = 0$ . As  $\beta$  increases, the intrinsic potential landscape varies from *Grassland to*  
 45 *Savanna*, and then *Forest* emerges and becomes more stable than *Savanna* until *Savanna* eventually vanishes.

46 The intrinsic path weights are the probabilities of each route for state switching in the zero fluctuation limit and thus  
 47 quantify the likelihood of different transition routes. Similarly, the dominant intrinsic path weight is the probability of the  
 48 dominant switching path and thus quantifies the dominant transition routes. The dominant intrinsic path probability can  
 49 in turn be quantified by the intrinsic action  $A_{in}(\mathbf{x})$ ( shown in Figure S3A).  $A_{inFS}$  is the intrinsic action of the dominant  
 50 intrinsic path from *Forest to Savanna* and  $A_{inSF}$  is the intrinsic action of the dominant intrinsic path from *Savanna to Forest*.  
 51 Figure S3D shows that the logarithm of the dominant intrinsic path probability from *Forest to Savanna* divided by that of the  
 52 dominant intrinsic path from *Savanna to Forest* decreases as  $\beta$  increases. Thus the dominant intrinsic path probability from

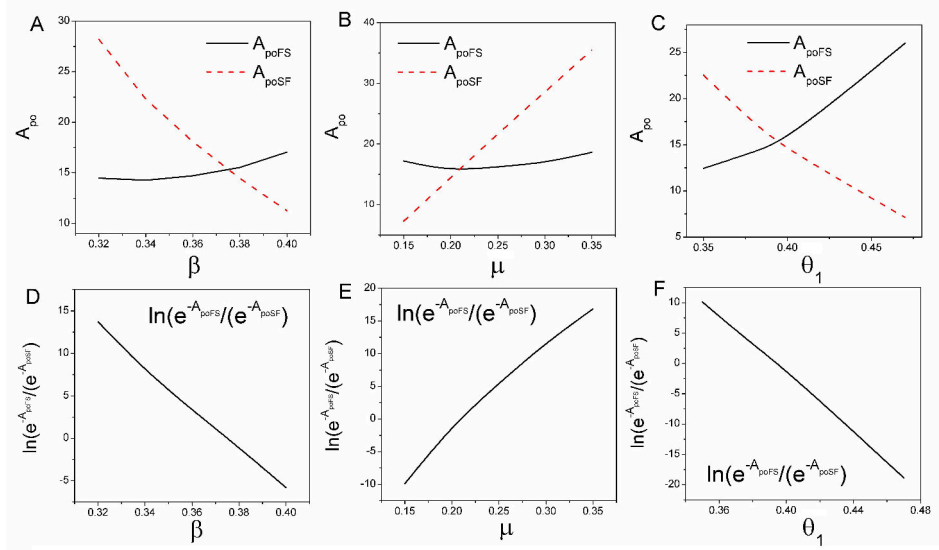

**Fig. S1.** A: The population action  $A_{poFS}$  of the probability of the dominant population path from *Forest* to *Savanna* and the population action  $A_{poSF}$  of the probability of the dominant population path from *Savanna* to *Forest* versus  $\beta$ . D: The probability of the dominant population path from *Forest* to *Savanna* divided by that of the dominant population path from *Savanna* to *Forest* versus  $\beta$ . B: The population action  $A_{poFS}$  and  $A_{poSF}$  versus  $\mu$ . E: The probability of the dominant population path from *Forest* to *Savanna* divided by that of the dominant population path from *Savanna* to *Forest* versus  $\mu$ . C: The population action  $A_{poFS}$  and  $A_{poSF}$  versus  $\theta_1$ . F: The probability of the dominant population path from *Forest* to *Savanna* divided by that of the dominant population path from *Savanna* to *Forest* versus  $\theta_1$ .

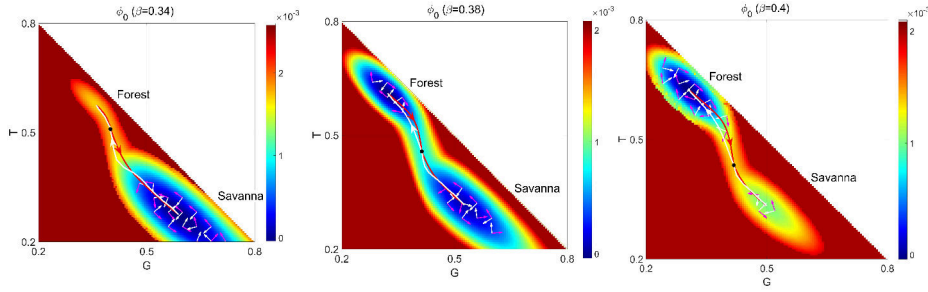

**Fig. S2.** The non-equilibrium intrinsic potential landscape  $\phi_0$  for increasing  $\beta$ . The white lines are the dominant intrinsic paths from the *Savanna* to *Forest*, while red lines are the dominant intrinsic paths from the *Forest* to *Savanna*. Purple arrows are the projection of the flux velocity and white arrows are the projection of the negative gradient of the intrinsic potential landscape  $-\nabla\phi_0$ .

53 *Forest* to *Savanna* decreases (or the dominant intrinsic path from *Savanna* to *Forest* increases) as  $\beta$  becomes larger. We also  
 54 show that the intrinsic action of the dominant intrinsic path for  $\mu$ ,  $\theta_1$  in Figure S3.

55 Figure S4 shows the population barrier heights versus parameter A:  $\beta$ , B: $\mu$ , C:  $\theta_1$ , D: $\nu$ , E: $\omega_0$ , F: $\omega_1$ . Figure S5 shows the  
 56 intrinsic barrier heights versus parameter A:  $\beta$ , B: $\mu$ , C:  $\theta_1$ , D: $\nu$ , E: $\omega_0$ , F: $\omega_1$ . Figure S6 shows the logarithm of MFPT versus A:  
 57  $\beta$ , B: $\mu$ , C:  $\theta_1$ . The logarithm of MFPT versus barrier heights for D:  $\beta$ , E: $\mu$ , F:  $\theta_1$ .

## 58 2. Ecological behavior as a function of the Savanna Sapling Mortality Rate $\mu$ .

### 59 2.1. Landscape, flux and dominant paths between different states versus Savanna Sapling Mortality Rate $\mu$ .

60 **2.1.a. Non-equilibrium population-potential landscape and the flux in finite fluctuation.**  $\mu$  represents savanna sapling mortality rate.  
 61 Figure S7A shows the deterministic phase diagram mapping the fraction of Grass cover versus  $\mu$ . When the savanna sapling  
 62 mortality rate is small the only one stable state is *Forest*, but as  $\mu$  is increased, *Forest* loses stability to *Savanna*. For  $\mu$  between  
 63 about 0.14 and 0.37, bistability emerges. Beyond 0.37, the dynamics are dominated by *Savanna*. For  $\mu$  larger than 0.37 but  
 64 less than 0.65, the *Grassland*  $[1, 0]$  state is always stable on the G-axis and unstable on the T-axis; For  $\mu$  beyond 0.65, the  
 65 *Grassland* state becomes stable. The corresponding stochastic phase diagram with respect to  $\mu$  ( $D = 0.0001$ ), in which stable  
 66 states correspond to local minima of the population-potential landscape, is shown in Figure 9B in the main text. Remarkably,  
 67 the *Grassland* states becomes quasi-stable for much lower values of  $\mu$  in the stochastic phase diagram, indicating a fragility of  
 68 the *Forest* ecological system which is purely induced by the stochastic fluctuations.

69 We now describe the concept and computation of the "stochastic phase diagram". When a deterministic nonlinear system  
 70 has multiple steady states, stochastic forcing can lead to the system to switch between the various attractors. The steady-state  
 71 probability density of the stochastic system can show multiple peaks and the topological shape of the steady-state probability

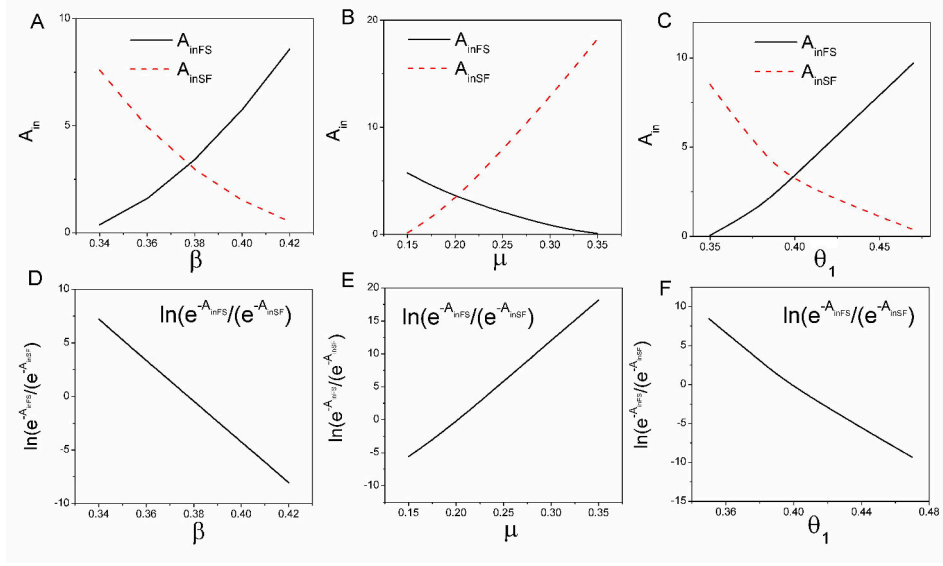

**Fig. S3.** A: The intrinsic action  $A_{inFS}$  of the probability of the intrinsic dominant intrinsic path from *Forest* state to *Savanna* state and the intrinsic action  $A_{inSF}$  of the probability of the intrinsic dominant intrinsic path from *Savanna* state to *Forest* state versus  $\beta$ . D: The probability of the dominant intrinsic path from *Forest* state to *Savanna* state divided that of the dominant intrinsic path from *Savanna* state to *Forest* state versus  $\beta$ . B: The intrinsic action  $A_{inFS}$  and  $A_{inSF}$  versus  $\mu$ . E: The probability of the dominant intrinsic path from *Forest* state to *Savanna* state divided that of the dominant intrinsic path from *Savanna* state to *Forest* state versus  $\mu$ . C: The intrinsic action  $A_{inFS}$  and  $A_{inSF}$  versus  $\theta_1$ . F: The probability of the dominant intrinsic path from *Forest* state to *Savanna* state divided that of the dominant intrinsic path from *Savanna* state to *Forest* state versus  $\theta_1$ .

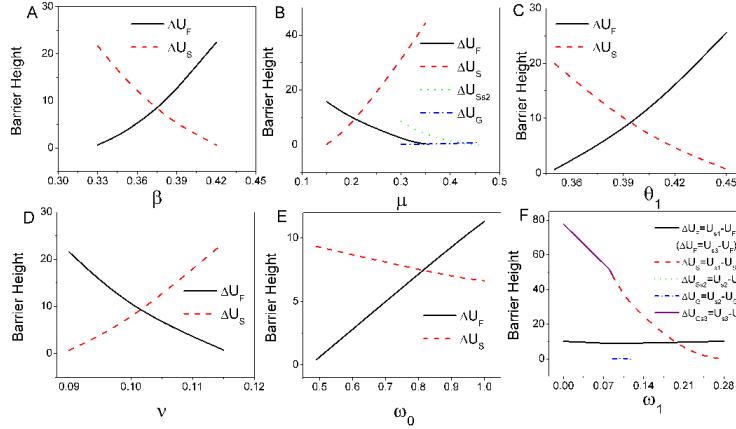

**Fig. S4.** The population barrier heights versus parameter A:  $\beta$ , B:  $\mu$ , C:  $\theta_1$ , D:  $\nu$ , E:  $\omega_0$ , F:  $\omega_1$

72 density can change as parameters vary. This may lead to the emergence of the so-called stochastic P bifurcation (4). Since our  
 73 model has a two dimensional state space the analytical expression for the phase diagram is often not available. Nevertheless,  
 74 the stochastic phase diagram can be obtained numerically through the behavior of the population barrier height  $\Delta U_G$  under  
 75 the finite fluctuations (we chose  $D = 0.0001$ ), where  $\Delta U_G$  represents the barrier height from *Grassland* state basin to the  
 76 *Savanna* state basin. We find that the population barrier height  $\Delta U_G$  approaches zero as  $\mu$  decreases to nearly  $\mu = 0.3$ . This  
 77 indicates that the *Grassland* state vanishes as  $\mu$  decreases to nearly  $\mu = 0.3$  under the finite fluctuations of  $D = 0.0001$  shown  
 78 in Figure 9 in the main text.

79 Figure S8 shows the population-potential landscapes for increasing  $\mu$  and Figure S9 shows the fluxes on the population-  
 80 potential landscapes (white arrows). Only stable state, *Forest*, is present when  $\mu$  is sufficiently small. As sapling mortality  
 81 rate  $\mu$  increases, the ecological transitions from *Forest* dominant to *Savanna* dominant, as shown in Figure S7A. As mortality  
 82 further increases, the *Forest* state is no longer stable and the remaining two stable states coexist: the coexistence of the  
 83 *Savanna* and the *Grassland* states. Eventually, at very high mortality rates, trees can no longer survive and the ecological  
 84 system is left with a unique stable attractor: *Grassland* ( $[1, 0]$ ). In Figure S9, we can see that both the negative gradient of the  
 85 population-potential landscapes and the non-zero flux are the driving forces for the dynamics of the forest-savanna ecological  
 86 system. When the system has both the *Savanna* and the *Forest* stable states, the fluxes originating from the vegetative growth  
 87 factors tend to enhance communications between the two stable states.

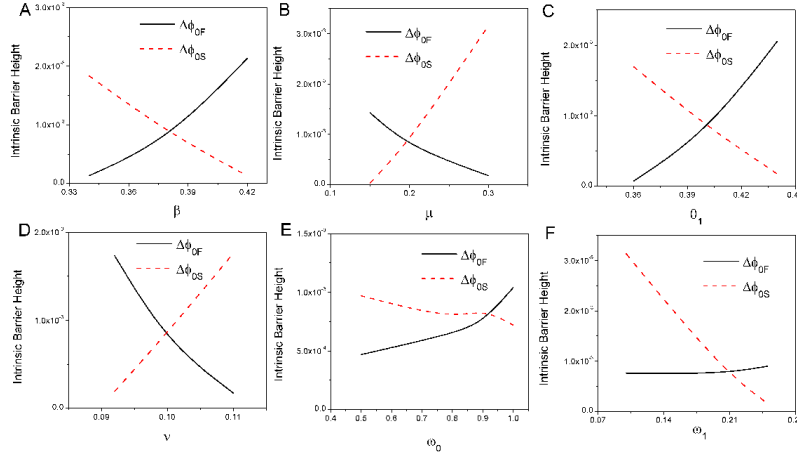

**Fig. S5.** The intrinsic barrier heights versus parameter A:  $\beta$ , B:  $\mu$ , C:  $\theta_1$ , D:  $\nu$ , E:  $\omega_0$ , F:  $\omega_1$ .

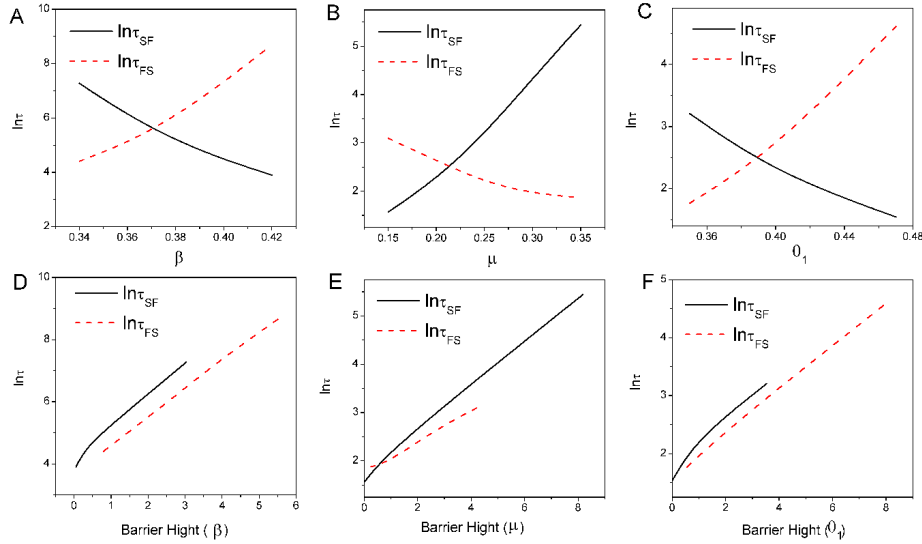

**Fig. S6.** The logarithm of MFPT versus A:  $\beta$ , B:  $\mu$ , C:  $\theta_1$ . The logarithm of MFPT versus barrier heights for D:  $\beta$ , E:  $\mu$ , F:  $\theta_1$ .

88 Figure S9 also shows the dominant population paths on the population landscape  $U$  for different values of  $\mu$ . The dominant  
 89 population path probability can be quantified by the population action  $A_{po}(\mathbf{x})$  shown in Figure S1B. Figure S1E shows the  
 90 logarithm of the dominant population path probability from the *Forest* state to the *Savanna* state divided by that of the  
 91 dominant population path from the *Savanna* state to the *Forest* state.

92 **2.1.c. Intrinsic potential landscape and flux velocity in the zero-fluctuation limit.** Figure S10 shows the intrinsic potential landscape  $\phi_0$   
 93 versus  $\mu$ . The intrinsic potential landscape changes from *Forest* dominant to *Savanna* and *Forest* coexistence, and then to  
 94 *Savanna* dominant as  $\mu$  increases.

95 Figure S11 shows the two-dimensional non-equilibrium intrinsic potential landscape  $\phi_0$  under the zero fluctuation limit  
 96 for increasing  $\mu$ . We concentrate on the parameter range of the coexistence of the two stable states in these two-dimensional  
 97 landscape figures since the complete phase changes of the intrinsic potential landscapes in the whole parameter range have  
 98 already been shown in the three-dimensional figure.

99 Figure S11 also shows the dominant intrinsic paths on the intrinsic potential landscape  $\phi_0$  with different  $\mu$ . The red lines  
 100 represent the dominant intrinsic paths from the *Forest* state to the *Savanna* state. The white lines represent the dominant  
 101 intrinsic paths from the *Savanna* state to the *Forest* state. The purple arrows represent the steady-state probability intrinsic  
 102 fluxes which guide the dominant intrinsic paths apart from the steepest descent path from the intrinsic potential landscape.  
 103 Therefore, the dominant intrinsic path from the *Savanna* state to the *Forest* state and the dominant intrinsic path from the  
 104 *Forest* state to the *Savanna* state are distinct; this is referred to as irreversibility of the dominant intrinsic paths and is due to  
 105 the presence of the nonequilibrium rotational intrinsic flux. The two dominant intrinsic paths both pass through the saddle

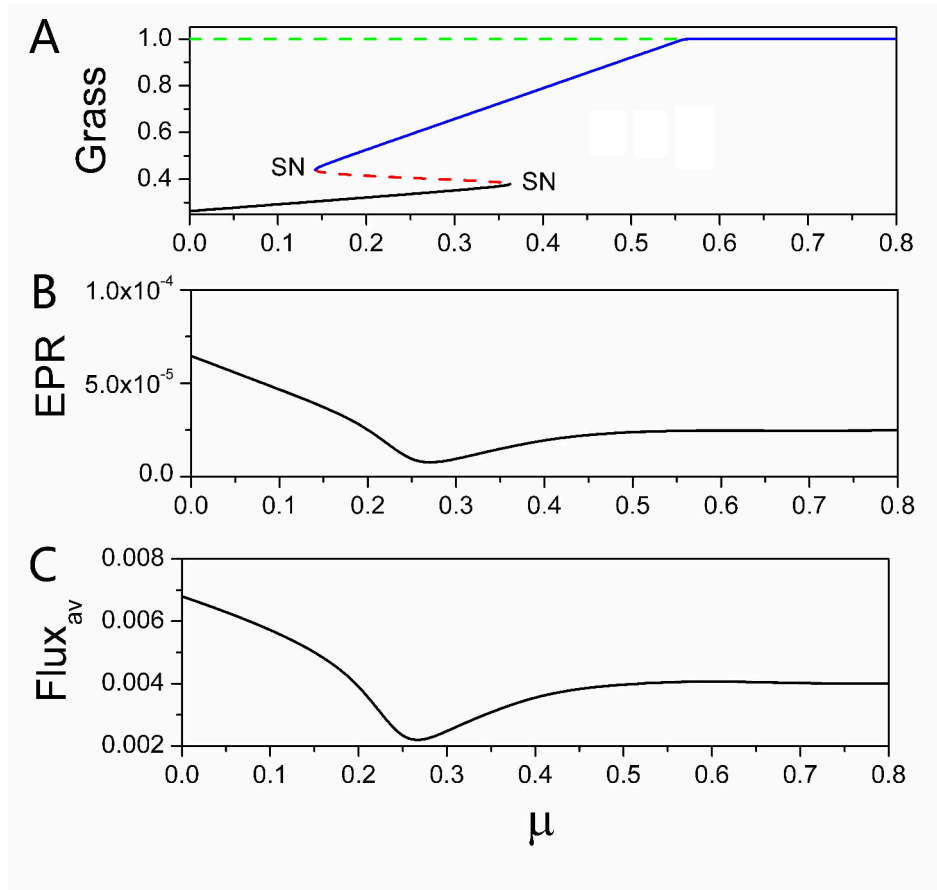

Fig. S7. A: The phase diagram versus parameter  $\mu$ . B: The population entropy production rate versus parameter  $\mu$ . C: The population average flux versus parameter  $\mu$ .

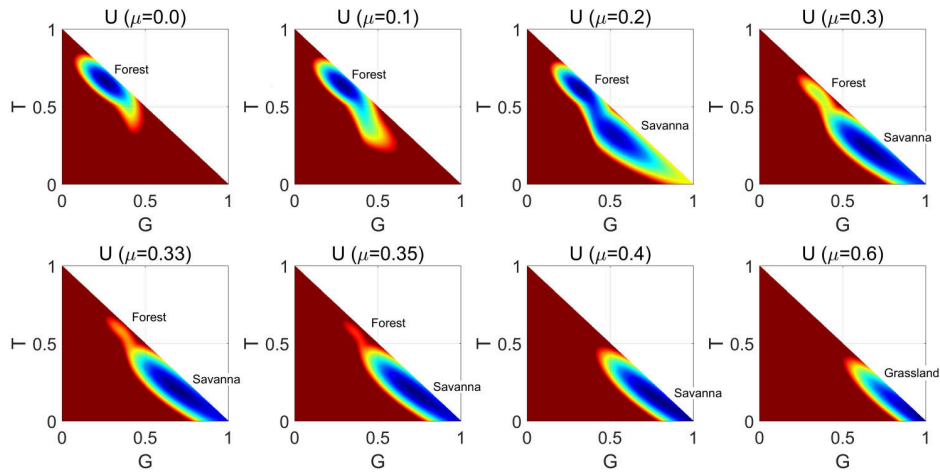

Fig. S8. The two-dimensional population-potential landscapes versus parameter  $\mu$ .

106 point (the black dot) on the figures.

107 The dominant intrinsic path probability can be quantified by the intrinsic action  $A_{in}(\mathbf{x})$ , which is shown in Figure S3B.  
 108 Figure S3E shows the logarithm of the dominant intrinsic path probability from the *Forest* state to the *Savanna* state divided  
 109 by that of the dominant intrinsic path from the *Savanna* state to the *Forest* state increases as  $\mu$  becomes larger.

110 **2.2.Barrier height and kinetic rates of switching.** Figures S4B and S5B show the barrier heights of the population-potential landscape  
 111 and the intrinsic barrier heights of the intrinsic potential landscape versus  $\mu$ . Here,  $\Delta U_G$  is the population barrier height  
 112 from the *Grassland* state to the saddle point  $s_2$  between the *Grassland* state and the *Savanna* state.  $\Delta U_{Ss_2}$  is the population  
 113 barrier height from the *Savanna* state to the saddle point  $s_2$ . We show the logarithm of MFPT versus  $\mu$  in Figure S6B and we

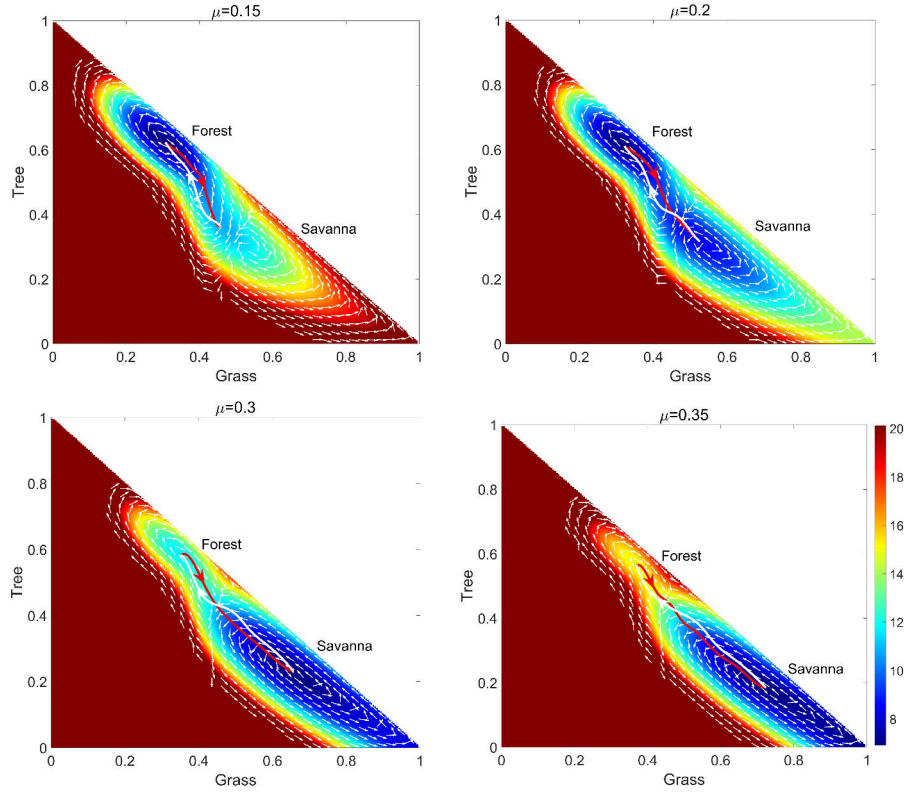

**Fig. S9.** The dominant population paths and fluxes on the population-potential landscape  $U$  with different  $\mu$ , at  $\beta = 0.38$ ,  $\nu = 0.1$ ,  $\omega_0 = 0.9$ ,  $\omega_1 = 0.2$ ,  $\theta_1 = 0.4$ ,  $s_1 = 0.01$ ,  $D = 0.0005$ . The white lines represent the dominant population paths from the *Savanna* state to *Forest* state. The red lines represent the dominant population paths from the *Forest* state to *Savanna* state. The white arrows represent the steady-state probability fluxes.

114 observe that the population-potential landscape topography (quantified by the barrier height) and the logarithm of MFPT  
 115 have positive correlation (Figure S6E). Thus, the barrier heights  $\Delta U_F$  and  $\Delta U_S$ , and the corresponding MFPTs  $\ln\tau_{FS}$  and  
 116  $\ln\tau_{SF}$  are correlated as  $\tau \sim \exp(\Delta U)$ .

### 117 2.3. Bifurcation diagrams, nonequilibrium flux and nonequilibrium thermodynamic cost.

118 **2.3.a. Finite fluctuations.** Figure S7B shows the population entropy production rate versus  $\mu$  and Figure S7C shows the population  
 119 average flux versus  $\mu$ . Both population *EPR* and population  $Flux_{av}$  decrease initially and then increase as  $\mu$  increases, and  
 120 both undergo significant changes in their slopes in the bifurcation zone between the two transitions shown in Figure S7B and  
 121 Figure S7C. This shows that the significant changes of average flux and entropy production may be a signal of bifurcation.  
 122 Therefore we can use the population average flux and population entropy production rate to quantify the global stability and  
 123 bifurcations of the ecological system. We found that the *Forest* state has more *EPR* and  $Flux_{av}$ , implying that the trees need  
 124 more vegetative growth factors, and require more nutrition and energy than grass from the environment. On the other hand,  
 125 the *Savanna* state needs less vegetative growth factors, and requires less nutrition and energy than trees from the environment.

126 The savanna-forest model we studied is a phenomenological model. The entropy production and dissipation cost in this  
 127 study are both obtained based on the model given. The entropy production and dissipation cost are thus calculated according  
 128 to the driving force and the associated dynamics of this model. They represent the global thermodynamic cost for the whole  
 129 system. It turns out that this global cost is directly related to the flux (approximately integral of the square of the flux  
 130 modulated by the diffusion coefficient over state space). This is the link between the nonequilibrium thermodynamics and the  
 131 nonequilibrium dynamics.

132 If one wants to know the specifics and details of the entropy and energy partition among trees/grass, further explorations  
 133 are needed with a more detailed microscopic model by identifying the source of the cost in growing trees explicitly. Extending  
 134 our analysis in this direction would be an interesting topic for future study. However, a more detailed microscopic model  
 135 should lead to the same conclusion as the phenomenological model we used here, at least in terms of the global dynamics and  
 136 thermodynamics at the macroscopic level.

137 **2.3.b. The zero fluctuation limit.** Figure S12A shows two phase transition points for this set of parameters and Figure S12B shows  
 138 the intrinsic entropy production rate versus  $\mu$ . Figure S12C shows the intrinsic average flux versus  $\mu$ , while Figure S12C shows  
 139 that the intrinsic  $Flux_{av}$  and entropy production rate have similar shapes. Both the intrinsic averaged flux and intrinsic entropy  
 140 production rate have significant changes along with the bifurcation shown in Figure S12A. The slope of the non-equilibrium



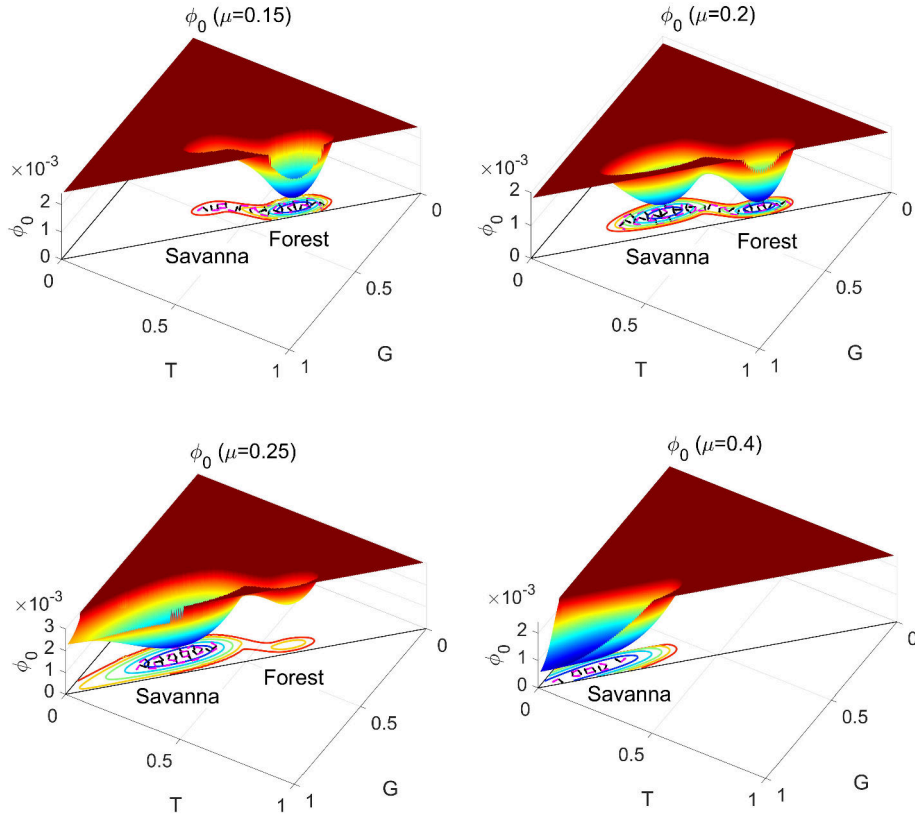

**Fig. S10.** The three-dimensional intrinsic potential landscape  $\phi_0$  for increasing  $\mu$ . The projection of the flux velocity (purple arrows) and the gradient of the intrinsic potential landscape  $-\nabla\phi_0$  (black arrows) on the intrinsic potential landscape  $\phi_0$  for increasing  $\mu$ .

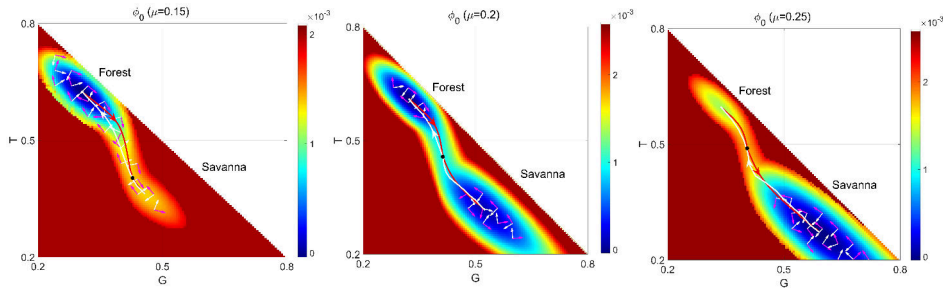

**Fig. S11.** The projection of the flux velocity (purple arrows) and the gradient of the intrinsic potential landscape  $-\nabla\phi_0$  (white arrows) on the intrinsic potential landscape  $\phi_0$  for increasing  $\mu$ . The dominant intrinsic paths on the intrinsic potential landscape  $\phi_0$  with different  $\mu$ . The white lines represent the dominant intrinsic paths from the *Savanna* state to *Forest* state. The red lines represent the dominant intrinsic paths from the *Forest* state to *Savanna* state.

141 intrinsic free energy changes significantly between the two saddle-node bifurcations, although the non-equilibrium intrinsic  
 142 free energy is continuous. Figure S12B, Figure S12C and Figure S12D show that significant slope changes in intrinsic entropy  
 143 production rate, intrinsic average flux and intrinsic free energy (analogous to the equilibrium case) may provide signals of  
 144 bifurcation. We can see that the non-equilibrium intrinsic free energy may also be useful to quantify the global phases of the  
 145 system and the bifurcations. Therefore, we may use this non-equilibrium intrinsic free energy function as well as the intrinsic  
 146 average flux and intrinsic entropy production rate to explore the global stability and bifurcations of the non-equilibrium  
 147 ecological dynamics.

### 148 **3. Ecological behavior as a function of the grass cover basic value $\theta_1$ .**

#### 149 **3.1. Landscape, flux and dominant paths.**

150 **3.1.a. Population-potential landscape and flux with finite fluctuation.**  $\theta_1$  represents grass cover basic value, i.e. the threshold onset  
 151 value for the fire rate sigmoid  $\omega$ . Figure S13A shows the phase diagram versus  $\theta_1$ , Figure S13B shows the population  
 152 entropy production rate versus  $\theta_1$ , and Figure S13C shows the average flux versus  $\theta_1$ . Figure S14 shows the two-dimensional



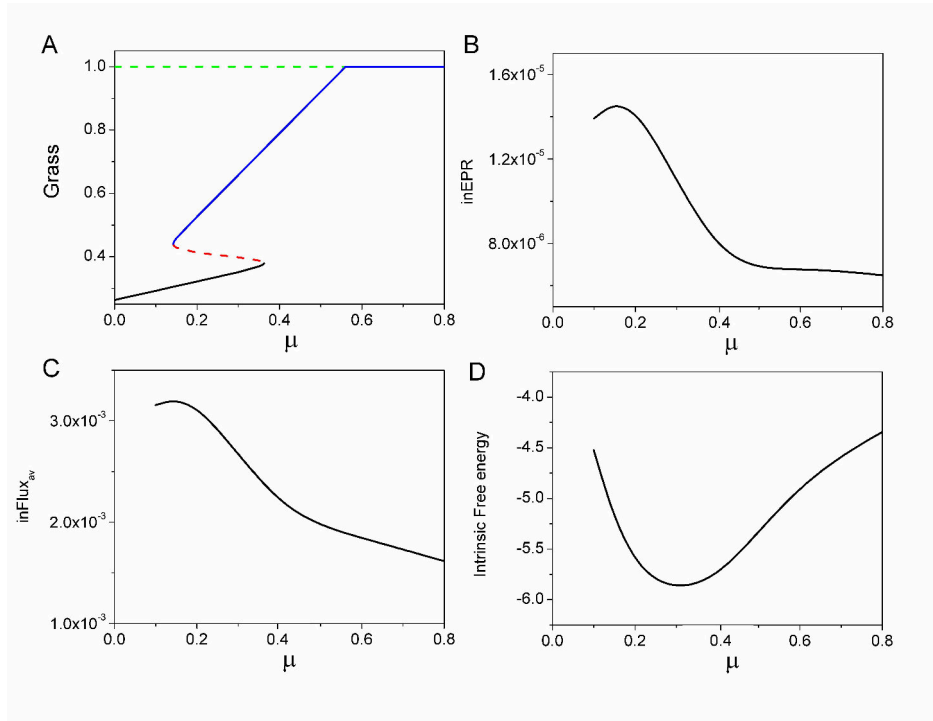

**Fig. S12.** A: The phase diagram versus  $\mu$ . B: The intrinsic entropy production rate versus  $\mu$ . C: The intrinsic average flux versus  $\mu$ . D: Intrinsic free energy versus  $\mu$ .

153 population-potential landscapes under finite fluctuations varying with the increase of  $\theta_1$ . Figure S15 shows the steady-state  
 154 probability fluxes under the increase of  $\theta_1$ , which are shown as the white arrows. Figure S15 also shows the dominant population  
 paths on the population landscape  $U$  for different values of  $\theta_1$  with the population action  $A_{po}(\mathbf{x})$  shown in Figure S1C.

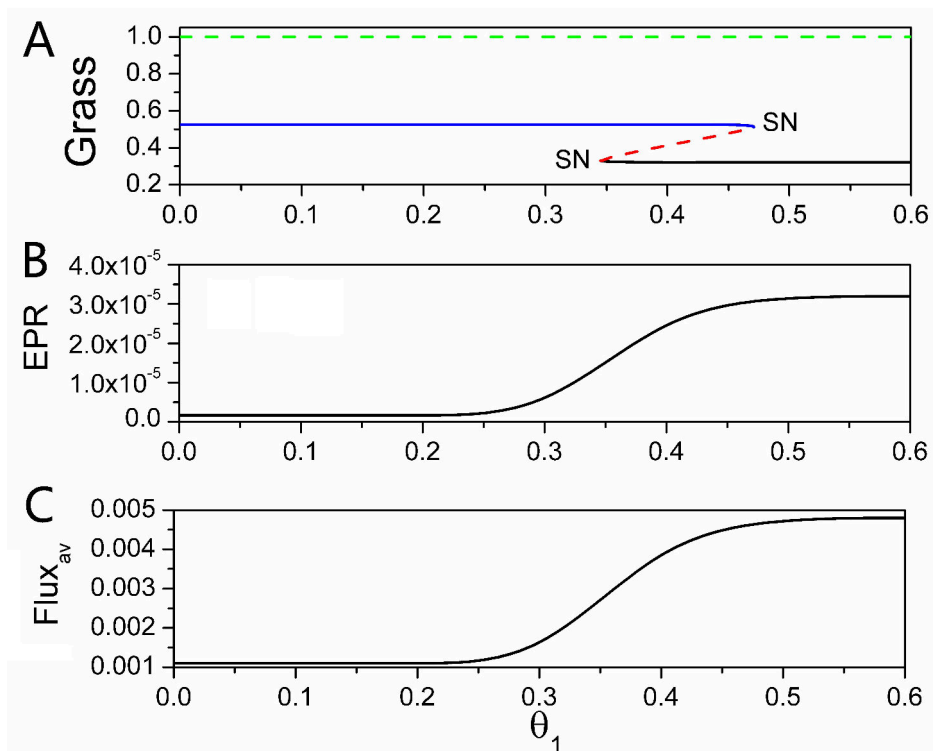

**Fig. S13.** A: The phase diagram versus  $\theta_1$ . B: The population entropy production rate versus  $\theta_1$ . C: The population average flux versus  $\theta_1$ .

155

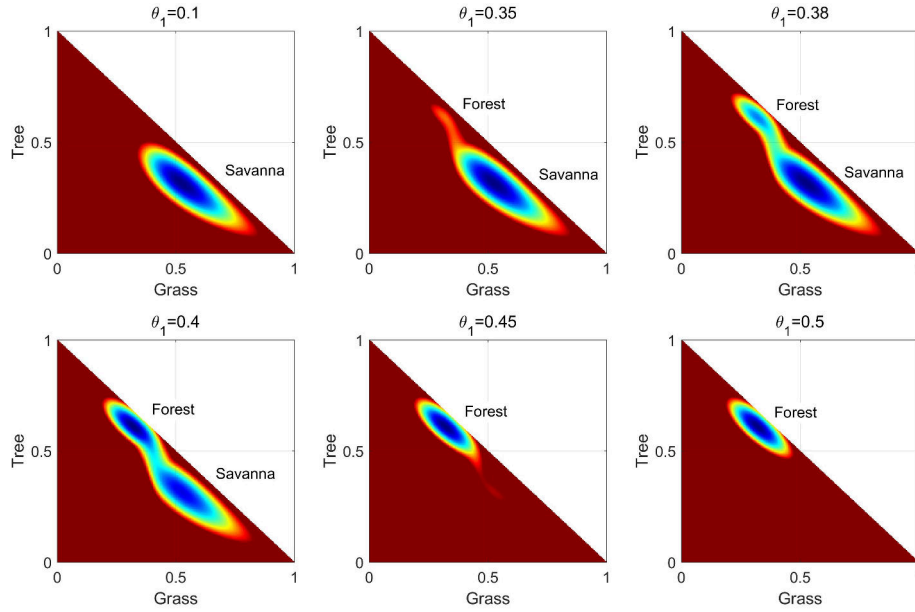

Fig. S14. The two-dimensional population-potential landscapes versus  $\theta_1$ .

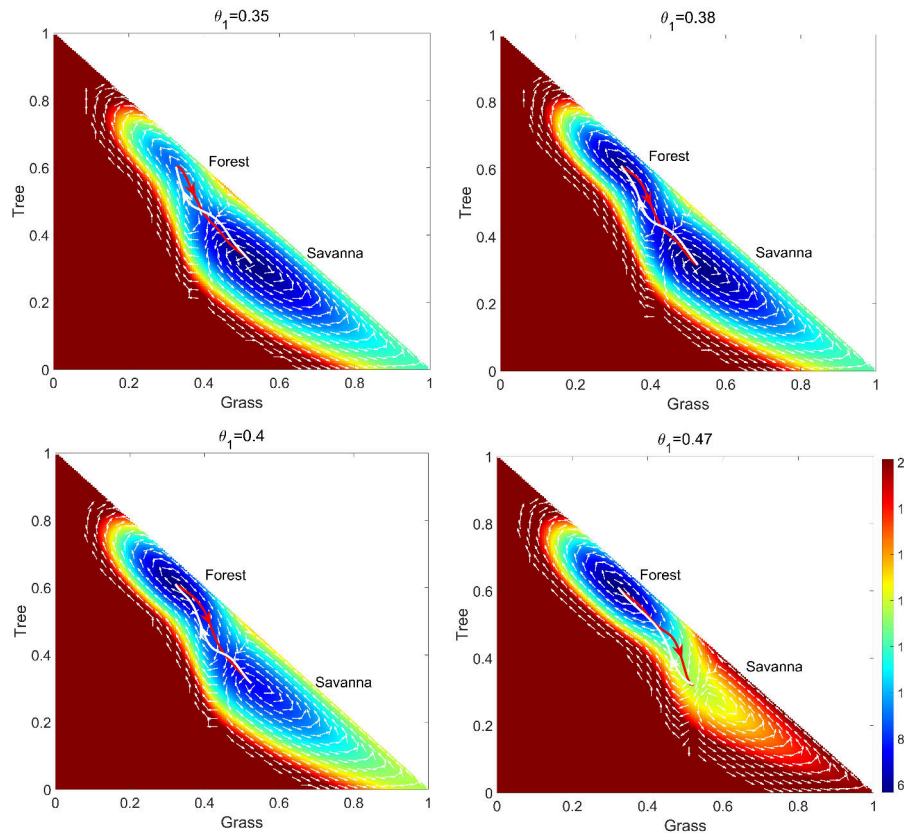

Fig. S15. The dominant population paths and fluxes on the population-potential landscape  $U$  with different  $\theta_1$ , at  $\beta = 0.38$ ,  $\nu = 0.1$ ,  $\omega_0 = 0.9$ ,  $\omega_1 = 0.2$ ,  $\mu = 0.2$ ,  $s_1 = 0.01$ ,  $D = 0.0005$ . The white lines represent the dominant population paths from the *Savanna* state to *Forest* state. The red lines represent the dominant population paths from the *Forest* state to *Savanna* state. The white arrows represent the steady-state probability fluxes.

156 **3.1.b. Non-equilibrium intrinsic potential landscape and flux velocity in the zero-fluctuation limit.** Figure S16 shows the intrinsic potential  
 157 landscape  $\phi_0$  and Figure S17 shows the non-equilibrium intrinsic potential landscape  $\phi_0$  in the zero fluctuation limit, both for  
 158 increasing values of  $\theta_1$ . Figure S17 also shows the dominant intrinsic paths on the intrinsic potential landscape  $\phi_0$  for different

159 values of  $\theta_1$ . The red lines are the dominant intrinsic paths from the *Forest* state to *Savanna* state, while the white lines are  
 160 the dominant intrinsic paths from the *Savanna* state to *Forest* state. Finally, the purple arrows represent the steady-state  
 161 probability intrinsic fluxes which guide the dominant intrinsic paths. The intrinsic action  $A_{in}(\mathbf{x})$  is shown in Figure S3C and  
 162 Figure S3F shows the logarithm of the dominant intrinsic path probability from the *Forest* state to the *Savanna* state divided  
 163 by that of the dominant intrinsic path from the *Savanna* state to the *Forest* state.

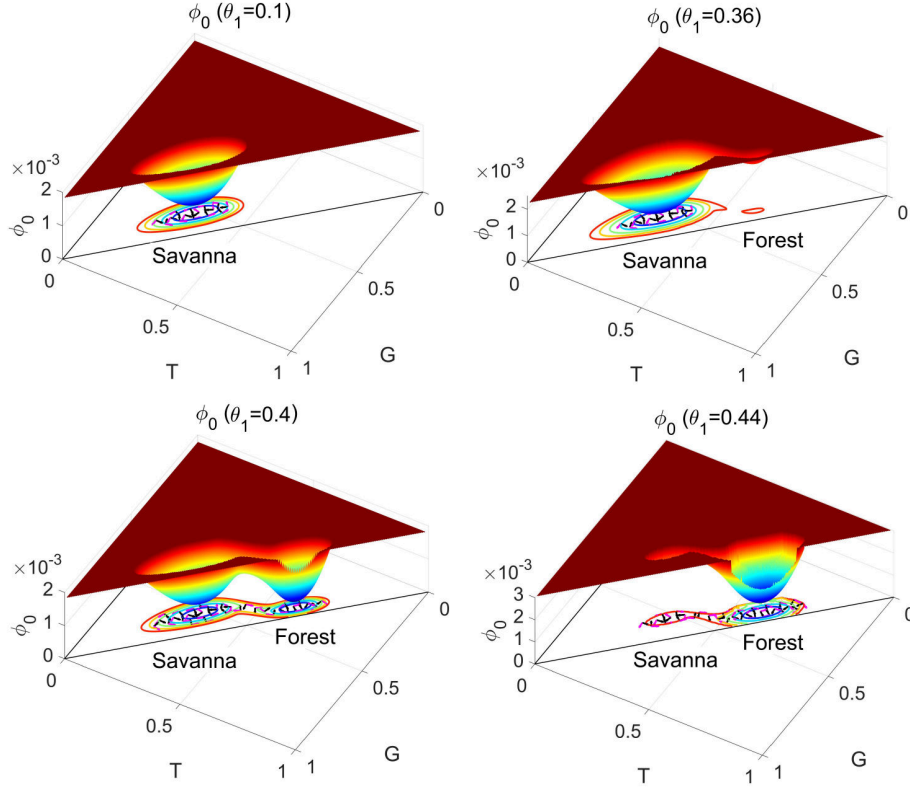

**Fig. S16.** The three-dimensional intrinsic potential landscape  $\phi_0$  for increasing  $\theta_1$ . The projection of the flux velocity (purple arrows) and the gradient of the intrinsic potential landscape  $-\nabla\phi_0$  (black arrows) on the intrinsic potential landscape  $\phi_0$ .

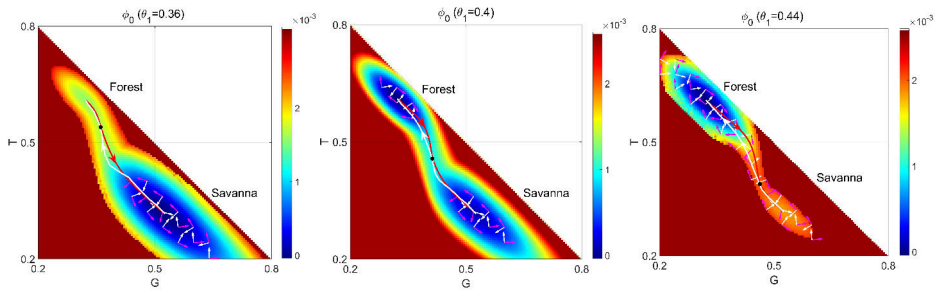

**Fig. S17.** The projection of the flux velocity (purple arrows) and the gradient of the intrinsic potential landscape  $-\nabla\phi_0$  (white arrows) on the intrinsic potential landscape  $\phi_0$  for increasing  $\theta_1$ . The dominant intrinsic paths on the intrinsic potential landscape  $\phi_0$  with different  $\theta_1$ . The white lines represent the dominant intrinsic paths from the *Savanna* state to *Forest* state. The red lines represent the dominant intrinsic paths from the *Forest* state to *Savanna* state.

164 **3.2. Barrier height and kinetic rates of switching.** Figure S4C and Figure S5C show the barrier heights of the population-potential  
 165 landscape and the intrinsic barrier heights of the intrinsic potential landscape versus  $\theta_1$  respectively. The logarithm of MFPT  
 166 versus  $\theta_1$  are shown in Figure S6C and we see that the population-potential landscape topography, quantified by the barrier  
 167 height, and the corresponding logarithm of MFPT have positive correlation, as shown in Figure S6F. Thus, the barrier height  
 168  $\Delta U_F$ ,  $\Delta U_S$  and the corresponding MFPT  $\ln\tau_{FS}$  and  $\ln\tau_{SF}$  have the correlations as  $\tau \sim \exp(\Delta U)$ .

169 **3.3. Bifurcation diagrams, nonequilibrium flux and nonequilibrium thermodynamic cost.**

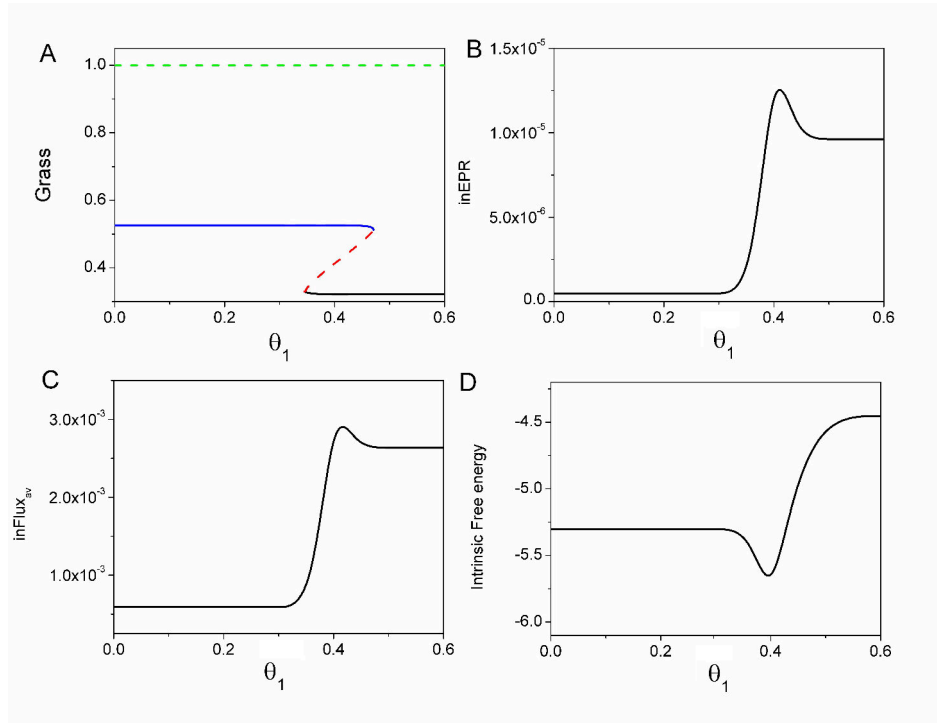

**Fig. S18.** A: The phase diagram versus  $\theta_1$ . B: The intrinsic entropy production rate versus  $\theta_1$ . C: The intrinsic average flux versus  $\theta_1$ . D: Intrinsic free energy versus  $\theta_1$ .

170 **3.3.a. Finite fluctuations.** Figure S13B shows the population entropy production rate versus  $\theta_1$ , while Figure S13C shows the  
 171 population average flux versus  $\theta_1$ . Both population *EPR* and population *Flux<sub>av</sub>* increase as  $\theta_1$  increases. We can also see that  
 172 both the two lines have a relative sharp changes in slopes in accordance with the bifurcation zone shown in Figure S13A. We  
 173 found that the *Forest* state has more population *EPR*, population *Flux<sub>av</sub>* and the non-equilibrium intrinsic free energy than  
 174 those of *Savanna* state.

175 **3.3.b. The zero fluctuation limit.** There are two phase transition points for this set of parameters shown in Figure S18A. Figure  
 176 S18B shows the intrinsic entropy production rate versus  $\theta_1$ . Figure S18C shows that the intrinsic average flux. The intrinsic  
 177 intrinsic *Flux<sub>av</sub>* and intrinsic *EPR* are shown in Figure S18C.

#### 178 4. Ecological behavior as a function of the savanna tree mortality rate $\nu$ .

##### 179 4.1. Landscape, flux and dominant paths between different states.

180 **4.1.a. Population-potential landscape and flux with finite fluctuation.** Figure S19A shows the phase diagram, Figure S19B shows the  
 181 population *EPR*, Figure S19C shows the average flux versus and Figure S20 shows the population-potential landscapes under  
 182 finite fluctuations. Figure S21 shows the fluxes on the population-potential landscapes with respect to the increase of  $\nu$ , which  
 183 are shown as white arrows. Figure S21 also shows the dominant population paths on the population landscape *U* for different  
 184 values of  $\nu$ . The population action  $A_{po}(\mathbf{x})$  is shown in Figure S22A and Figure S22D shows the logarithm of the dominant  
 185 population path probability from the *Forest* state to the *Savanna* state divided by that of the dominant population path from  
 186 the *Savanna* state to the *Forest* state.

187 **4.1.b. Intrinsic potential landscape and flux velocity in the zero-fluctuation limit.** Figure S23 shows the intrinsic potential landscape  $\phi_0$   
 188 for increasing  $\nu$ , while Figure S24 shows the intrinsic potential landscape  $\phi_0$  in 2D under zero fluctuation limit. Figure S24 also  
 189 shows the dominant intrinsic paths on the intrinsic potential landscape with the same coloring conventions as in the figures  
 190 above. The intrinsic action  $A_{in}(\mathbf{x})$  is shown in Figure S25A and Figure S25D shows the logarithm of the dominant intrinsic  
 191 path probability from the *Forest* state to the *Savanna* state divided by that of the dominant intrinsic path from the *Savanna*  
 192 state to the *Forest* state.

193 **4.2. Barrier height and kinetic rates of switching.** Figure S4D and Figure S5D show the barrier heights of the population-potential  
 194 landscape the intrinsic barrier heights of the intrinsic potential landscape versus  $\nu$  respectively. Figure S26 shows the logarithm  
 195 of MFPT versus A: $\nu$ , B: $\omega_0$ , C: $\omega_1$  and the logarithm of MFPT versus barrier heights for D:  $\nu$ , E: $\omega_0$ , F:  $\omega_1$ . We show the  
 196 logarithm of MFPT versus  $\nu$  in Figure S26A.

##### 197 4.3. Bifurcation diagrams, nonequilibrium flux and nonequilibrium thermodynamic cost.

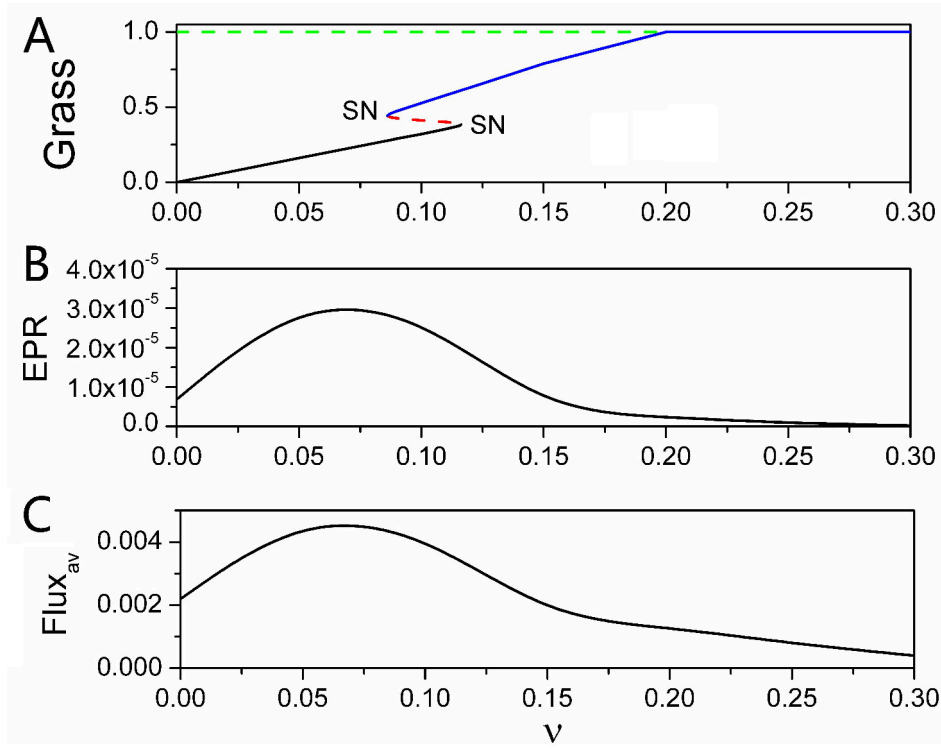

Fig. S19. A: The phase diagram versus  $\nu$ . B: The population entropy production rate versus  $\nu$ . C: The population average flux versus  $\nu$ .

198 **4.3.a. Finite fluctuations.** Figure S19B shows the population  $EPR$  versus  $\nu$ , while Figure S19C shows the average flux versus  $\nu$ .  
 199 The population  $EPR$  and population  $Flux_{av}$  increase initially then decrease as  $\nu$  increases. We can see that both the two lines  
 200 have a relative significant changes in slopes in accordance with the bifurcation zone shown in Figure S19A. We found that the  
 201 *Forest* state has more population  $EPR$ , population  $Flux_{av}$  and the non-equilibrium intrinsic free energy than those of *Savanna*.

202 **4.3.b. The zero fluctuation limit.** There are two phase transition points for this set of parameters, as shown in Figure S27A. Figure  
 203 S27B shows the intrinsic entropy production rate versus  $\nu$ . Figure S27C shows the intrinsic average flux versus  $\nu$  and Figure  
 204 S27D shows the intrinsic free energy versus  $\nu$ .

## 205 5. Ecological behavior as a function of the sapling-to-adult recruitment rate basic value $\omega_0$ .

### 206 5.1. Landscape, flux and dominant paths between different states.

207 **5.1.a. Population-potential landscape and flux with finite fluctuations.** Figure S28A shows the phase diagram versus  $\omega_0$ . Figure S28B  
 208 shows the population entropy production rate versus  $\omega_0$ . Figure S28C shows the average flux versus  $\omega_0$  and Figure S29 shows  
 209 the two-dimensional population-potential landscapes under finite fluctuations with respect to the increase of  $\omega_0$ . Figure S30  
 210 shows the steady-state probability fluxes on the population-potential landscapes with respect to the increase of  $\omega_0$ , which are  
 211 shown as white arrows.

212 Figure S30 also shows the dominant population paths on the population landscape  $U$  for different values of  $\omega_0$ . The  
 213 population action  $A_{po}(\mathbf{x})$  is shown in Figure S22B and Figure S22E shows the logarithm of the dominant population path  
 214 probability from the *Forest* state to the *Savanna* state divided by that of the dominant population path from the *Savanna* state  
 215 to the *Forest* state.

216 **5.1.b. Non-equilibrium intrinsic potential landscape and the flux velocity in zero-fluctuation limit.** Figure S31 shows the three-dimensional  
 217 intrinsic potential landscape  $\phi_0$  for increasing  $\omega_0$ . Figure S32 shows the two-dimensional non-equilibrium intrinsic potential  
 218 landscape  $\phi_0$  under zero fluctuations and Figure S32 shows the dominant intrinsic paths on the intrinsic potential landscape  $\phi_0$   
 219 for different values of  $\omega_0$ . The intrinsic action  $A_{in}(\mathbf{x})$  is shown in Figure S25B and Figure S25E shows the logarithm of the  
 220 dominant intrinsic path probability from the *Forest* state to the *Savanna* state divided by that of the dominant intrinsic path  
 221 from the *Savanna* state to the *Forest* state.

222 **5.2. Barrier height and kinetic rates of switching.** Figure S4E and Figure S5E show the barrier heights of the population-potential  
 223 landscape and the intrinsic barrier heights of the intrinsic potential landscape versus  $\omega_0$  respectively. We show the logarithm of  
 224 MFPT versus  $\omega_0$  in Figure S26B. We can see the population-potential landscape topography quantified by the barrier height  
 225 and the corresponding logarithm of MFPT have positive correlation shown in Figure S26E. Thus, the barrier height  $\Delta U_F$ ,  
 226  $\Delta U_S$  and the corresponding MFPT  $\ln\tau_{FS}$ ,  $\ln\tau_{SF}$  have the correlation of  $\tau \sim \exp(\Delta U)$ .

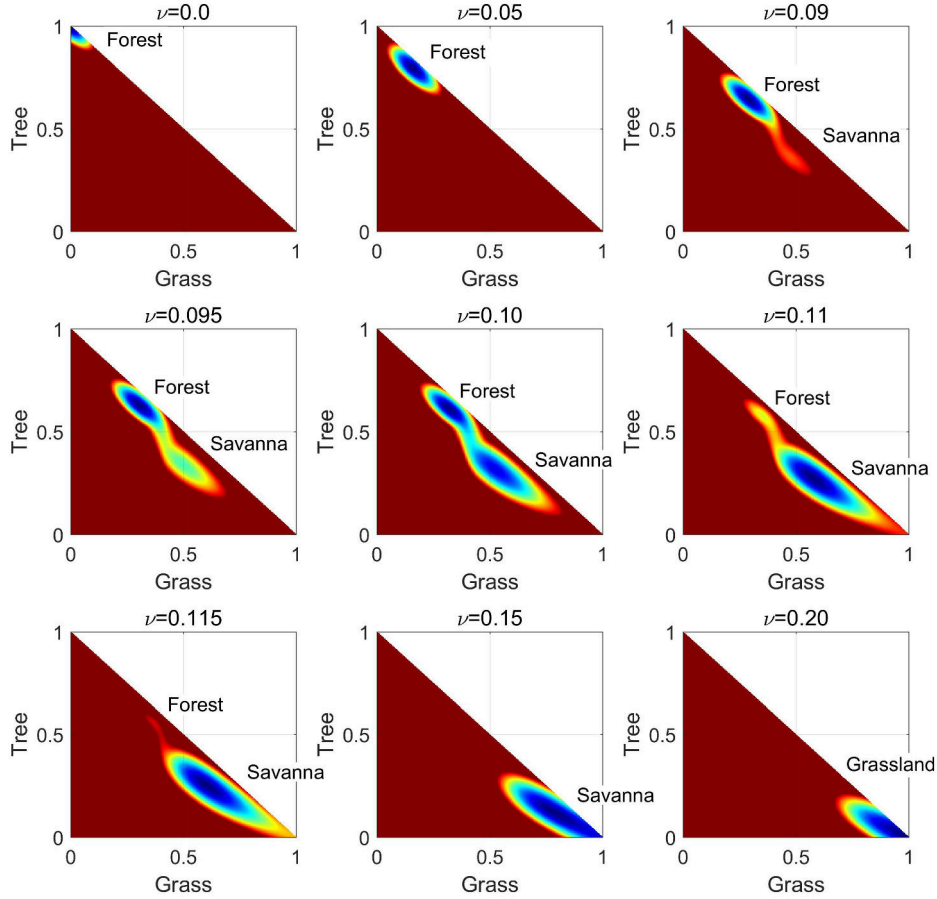

Fig. S20. The two-dimensional population-potential landscapes versus  $\nu$ .

227 **5.3. Bifurcation diagrams, nonequilibrium flux and nonequilibrium thermodynamic cost.**

228 **5.3.a. Finite fluctuations.** Figure S28B shows the population entropy production rate versus  $\omega_0$ . Figure S28C shows the average  
 229 flux versus  $\omega_0$ . We can see both population  $EPR$  and population  $Flux_{av}$  increase as  $\omega_0$  increases. We can see both the two lines  
 230 have a relative significant changes in slopes near (between) the two saddle-node bifurcations shown in Figure S28A. The *Forest*  
 231 state has more population  $EPR$ , population  $Flux_{av}$  and the non-equilibrium intrinsic free energy than those of *Savanna* state.

232 **5.3.b. The zero fluctuation limit.** There are two phase transition points for this set of parameters which is shown in Figure S33A.  
 233 Figure S33B shows the intrinsic entropy production rate versus  $\omega_0$  and Figure S33C shows the intrinsic average flux versus  $\omega_0$ .

234 **6. Ecological behavior as a function of the savanna sapling-to-adult recruitment rate of sigmoid basic value  $\omega_1$ .**

235 **6.1. Landscape, flux and dominant paths between different states.**

236 **6.1.a. Population-potential landscape and flux with finite fluctuations.**  $\omega_1$  is the savanna sapling-to-adult recruitment rate minimum in  
 237 the function  $\omega$ . Figure S34A shows the phase diagram, Figure S34B shows the population entropy production rate, and Figure  
 238 S34C shows the average flux versus  $\omega_1$ . Figure S35 and Figure S36 show the two-dimensional population-potential landscapes  
 239 under finite fluctuations and the fluxes on the population landscapes respectively.

240 **6.1.b. Intrinsic potential landscape and flux velocity in the zero-fluctuation limit.** Figure S37 shows the three-dimensional intrinsic  
 241 potential landscape  $\phi_0$  with increasing  $\omega_1$ , while Figure S38 shows the two-dimensional non-equilibrium intrinsic potential  
 242 landscape  $\phi_0$  for increasing  $\omega_1$  along with the dominant intrinsic paths. The intrinsic action  $A_{in}(\mathbf{x})$  is shown in Figure S25C  
 243 and Figure S25F shows the logarithm of the dominant intrinsic path probability from the *Forest* state to the *Savanna* state  
 244 divided by that of the dominant intrinsic path from the *Savanna* state to the *Forest* state.

245 **6.2. Barrier height and kinetic rates of switching.** Figure S4F and Figure S5F show the barrier heights of the population-potential  
 246 landscape under finite fluctuations and the intrinsic barrier heights of the intrinsic potential landscape versus  $\omega_1$  respectively.  $s_1$   
 247 is the saddle point between *Forest* state and *Savanna* state.  $s_2$  is the saddle point between *Grassland* state and *Savanna* state.  
 248  $s_3$  is the saddle point between *Grassland* state and *Forest* state with small  $\omega_1$ . Thus,  $\Delta U_F = U_{s_1} - U_F$  or  $\Delta U_F = U_{s_3} - U_F$ ,



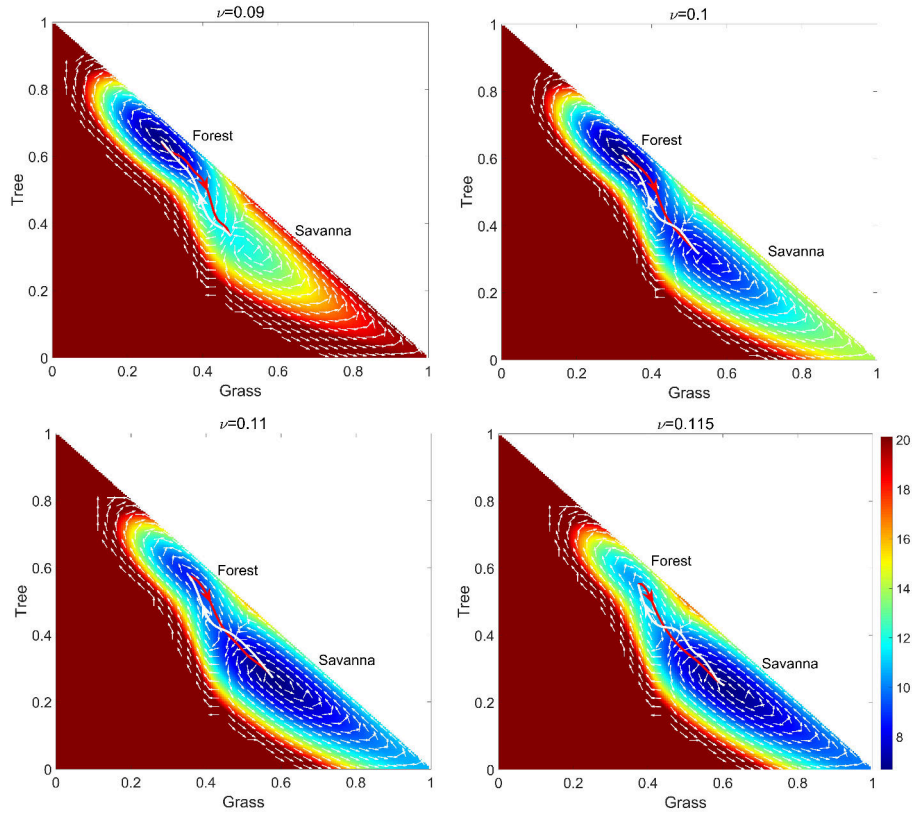

**Fig. S21.** The dominant population paths and fluxes on the population-potential landscape  $U$  with different  $\nu$ , at  $\beta = 0.38$ ,  $\theta_1 = 0.4$ ,  $\omega_0 = 0.9$ ,  $\omega_1 = 0.2$ ,  $\mu = 0.2$ ,  $s_1 = 0.01$ ,  $D = 0.0005$ . The white lines represent the dominant population paths from the *Savanna* state to *Forest* state. The red lines represent the dominant population paths from the *Forest* state to *Savanna* state. The white arrows represent the steady-state probability fluxes.

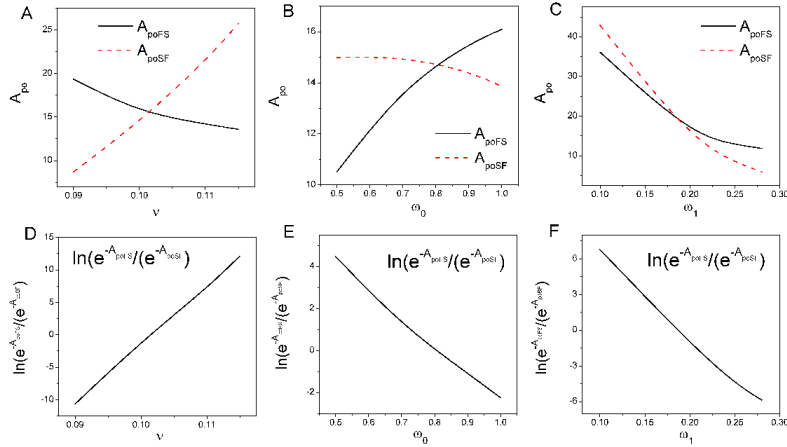

**Fig. S22.** A: The population action  $A_{poFS}$  of the probability of the dominant population path from *Forest* state to *Savanna* state and the action  $A_{poSF}$  of the probability of the dominant population path from *Savanna* state to *Forest* state versus  $\nu$ . D: The probability of the dominant population path from *Forest* state to *Savanna* state divided that of the dominant population path from *Savanna* state to *Forest* state versus  $\nu$  with  $\beta = 0.38$ ,  $\omega_0 = 0.9$ ,  $\omega_1 = 0.2$ ,  $\theta_1 = 0.4$ ,  $s_1 = 0.01$ ,  $\mu = 0.2$ . B: The population action  $A_{poFS}$  and  $A_{poSF}$  versus  $\omega_0$ . E: The probability of the dominant population path from *Forest* state to *Savanna* state divided that of the dominant population path from *Savanna* state to *Forest* state versus  $\omega_0$  with  $\beta = 0.38$ ,  $\nu = 0.1$ ,  $\mu = 0.2$ ,  $\omega_1 = 0.2$ ,  $\theta_1 = 0.4$ ,  $s_1 = 0.01$ . C: The population action  $A_{poFS}$  and  $A_{poSF}$  versus  $\omega_1$ . F: The probability of the dominant population path from *Forest* state to *Savanna* state divided that of the dominant population path from *Savanna* state to *Forest* state versus  $\omega_1$  with  $\beta = 0.38$ ,  $\nu = 0.1$ ,  $\omega_0 = 0.9$ ,  $\theta_1 = 0.4$ ,  $s_1 = 0.01$ ,  $\mu = 0.2$ .

249  $\Delta U_S = U_{s1} - U_S$ ,  $\Delta U_{Ss_2} = U_{s2} - U_S$ ,  $\Delta U_G = U_{s2} - U_G$  and  $\Delta U_{Gs_3} = U_{s3} - U_G$ . We show the logarithm of MFPT versus  
 250  $\omega_1$  in Figure S26C. We can see that the population-potential landscape topography quantified by the barrier height and the

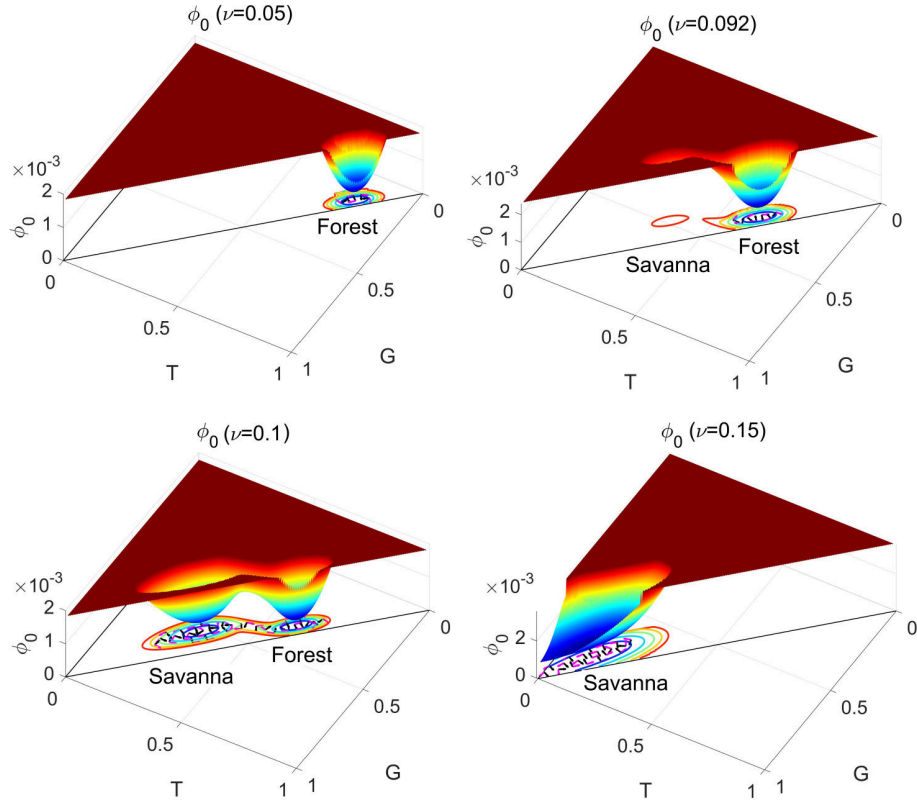

**Fig. S23.** The three-dimensional intrinsic potential landscape  $\phi_0$  for increasing  $\nu$ . The projection of the flux velocity (purple arrows) and the gradient of the intrinsic potential landscape  $-\nabla\phi_0$  (black arrows) on the intrinsic potential landscape  $\phi_0$  for increasing  $\nu$ .

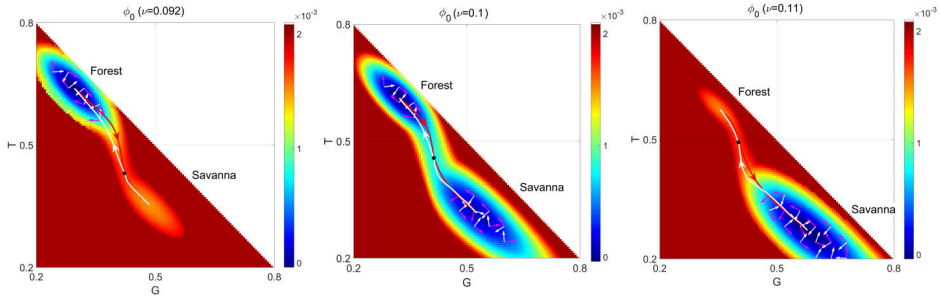

**Fig. S24.** The projection of the flux velocity (purple arrows) and the gradient of the intrinsic potential landscape  $-\nabla\phi_0$  (white arrows) on the intrinsic potential landscape  $\phi_0$  for increasing  $\nu$ . The dominant intrinsic paths on the intrinsic potential landscape  $\phi_0$  with different  $\nu$ . The white lines represent the dominant intrinsic paths from the *Savanna* state to *Forest* state. The red lines represent the dominant intrinsic paths from the *Forest* state to *Savanna* state.

251 corresponding logarithm of MFPT have positive correlation shown in Figure S26F. Thus, the barrier height  $\Delta U_F$ ,  $\Delta U_S$  and  
 252 the corresponding MFPT  $\ln\tau_{FS}$ ,  $\ln\tau_{SF}$  have the correlation of  $\tau \sim \exp(\Delta U)$ .

253 **6.3. Bifurcation diagrams, nonequilibrium flux and nonequilibrium thermodynamic cost.**

254 **6.3.a. Finite fluctuations.** Figure S34B and S34C show the population *EPR* and the population average flux versus  $\omega_1$ , while the  
 255 corresponding bifurcations diagram is shown in Figure S34A.

256 **6.3.b. The zero fluctuation limit.** There are two phase transition points for this set of parameters, as shown in Figure S39A. Figure  
 257 S39B and S39C show the intrinsic *EPR* and the intrinsic average flux versus  $\omega_1$ . Figure S39D shows the intrinsic free energy  
 258 versus  $\omega_1$ .

259 **6.4. The average change of the forward and backward in time cross-correlation function, the variances grass and trees, and the logarithms of  
 260 the variances of the first passage time.** Figure S40 shows the average change of the forward and backward in time cross correlation  
 261 function  $\Delta CC$  as a function of different parameter A:  $\mu$ , B:  $\theta_1$ , C:  $\nu$ , D:  $\omega_0$ , E:  $\omega_1$ . Figure S41 shows the variances *Grass*  $\sigma_S$  and

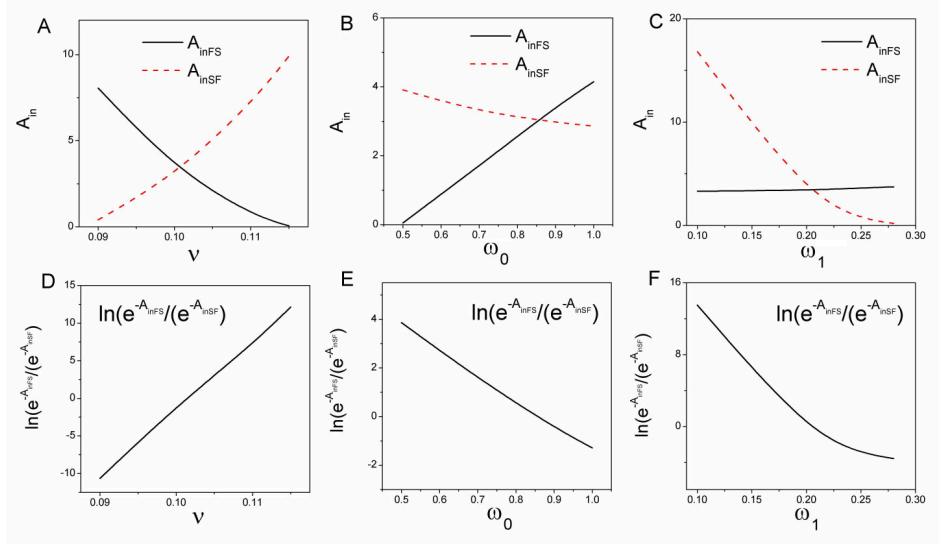

**Fig. S25.** A: The intrinsic action  $A_{inFS}$  of the probability of the dominant intrinsic path from *Forest* state to *Savanna* state and the intrinsic action  $A_{inSF}$  of the probability of the dominant intrinsic path from *Savanna* state to *Forest* state versus  $\nu$ . D: The probability of the dominant intrinsic path from *Forest* state to *Savanna* state divided that of the dominant intrinsic path from *Savanna* state to *Forest* state versus  $\nu$  with  $\beta = 0.38$ ,  $\omega_0 = 0.9$ ,  $\omega_1 = 0.2$ ,  $\theta_1 = 0.4$ ,  $ss_1 = 0.01$ ,  $\mu = 0.2$ . B: The intrinsic action  $A_{inFS}$  and  $A_{inSF}$  versus  $\omega_0$ . E: The probability of the intrinsic dominant intrinsic path from *Forest* state to *Savanna* state divided that of the dominant intrinsic path from *Savanna* state to *Forest* state versus  $\omega_0$  with  $\beta = 0.38$ ,  $\nu = 0.1$ ,  $\mu = 0.2$ ,  $\omega_1 = 0.2$ ,  $\theta_1 = 0.4$ ,  $ss_1 = 0.01$ . C: The intrinsic action  $A_{inFS}$  and  $A_{inSF}$  versus  $\omega_1$ . F: The probability of the dominant intrinsic path from *Forest* state to *Savanna* state divided that of the dominant intrinsic path from *Savanna* state to *Forest* state versus  $\omega_1$  with  $\beta = 0.38$ ,  $\nu = 0.1$ ,  $\omega_0 = 0.9$ ,  $\theta_1 = 0.4$ ,  $ss_1 = 0.01$ ,  $\mu = 0.2$ .

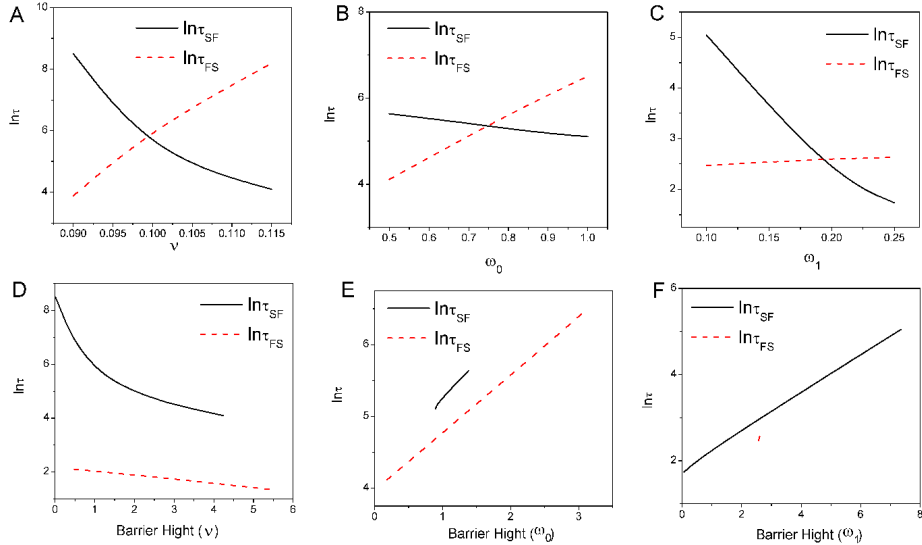

**Fig. S26.** The logarithm of MFPT versus A:  $\nu$ , B:  $\omega_0$ , C:  $\omega_1$ . The logarithm of MFPT versus barrier heights for D:  $\nu$ , E:  $\omega_0$ , F:  $\omega_1$ .

262 the variances  $\sigma_F$  versus A:  $\mu$ , B:  $\theta_1$ , C:  $\nu$ , D:  $\omega_0$ , E:  $\omega_1$ . Figure S42 shows the logarithms of the variances of the first passage  
 263 time from *Savanna* to *Forest* ( $\log(\sigma_{SF})$ ) and the first passage time from *Forest* to *Savanna* ( $\log(\sigma_{FS})$ ), and the logarithms of the  
 264 sum of them  $\log(\sigma_{SF} + \sigma_{FS})$  with A:  $\mu$ , B:  $\theta_1$ , C:  $\nu$ , D:  $\omega_0$ , E:  $\omega_1$ .

265 **7. The intrinsic potential landscape  $\phi_0$  and the Hamilton-Jacobi equation for a specific diffusion matrix.** We obtain the intrinsic  
 266 potential landscape  $\phi_0$  by the fitting method described in the main text due to the constraint of a triangle state space. In  
 267 order to find the intrinsic Lyapunov function  $\phi_0(\mathbf{D})$  numerically, we choose the diffusion matrix  $\mathbf{D} = D\mathbf{G}$  with the form  
 268  $G_{ij} = x_i(\delta_{ij} - x_j)$ . This diffusion coefficient matrix originates from evolutionary population dynamics (5, 6). The diffusion  
 269 coefficient matrix is thus given by:

$$\mathbf{G} = \begin{pmatrix} x_1(1-x_1) & -x_1x_2 & -x_1x_3 \\ -x_2x_1 & x_2(1-x_2) & -x_2x_3 \\ -x_3x_1 & -x_3x_2 & x_3(1-x_3) \end{pmatrix} \quad [1]$$

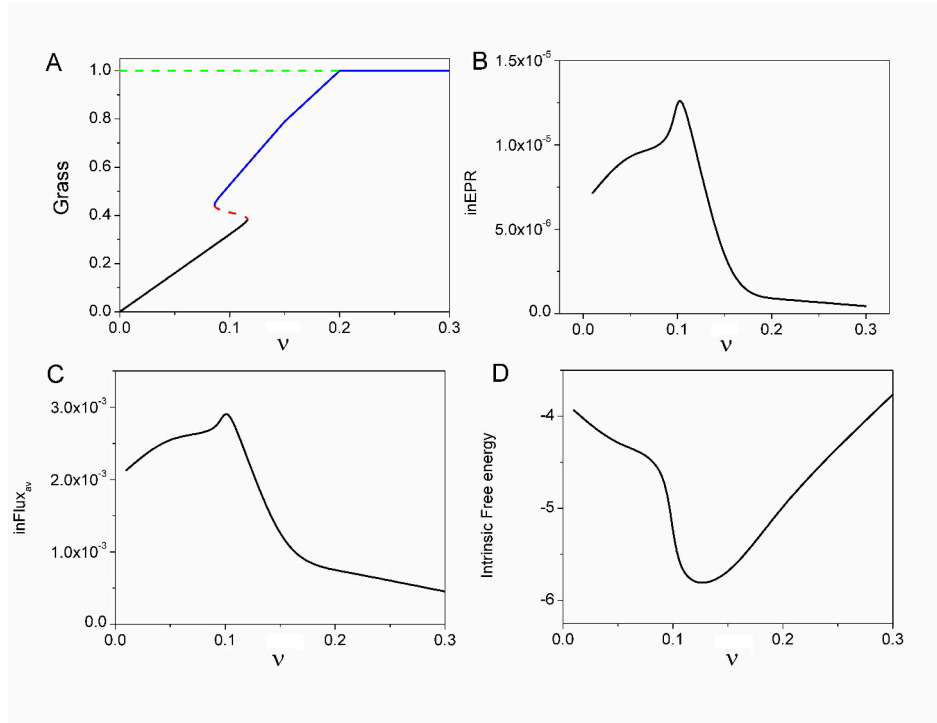

Fig. S27. A: The phase diagram versus  $\nu$ . B: The intrinsic entropy production rate versus  $\nu$ . C: The intrinsic average flux versus  $\nu$ . D: Intrinsic free energy versus  $\nu$ .

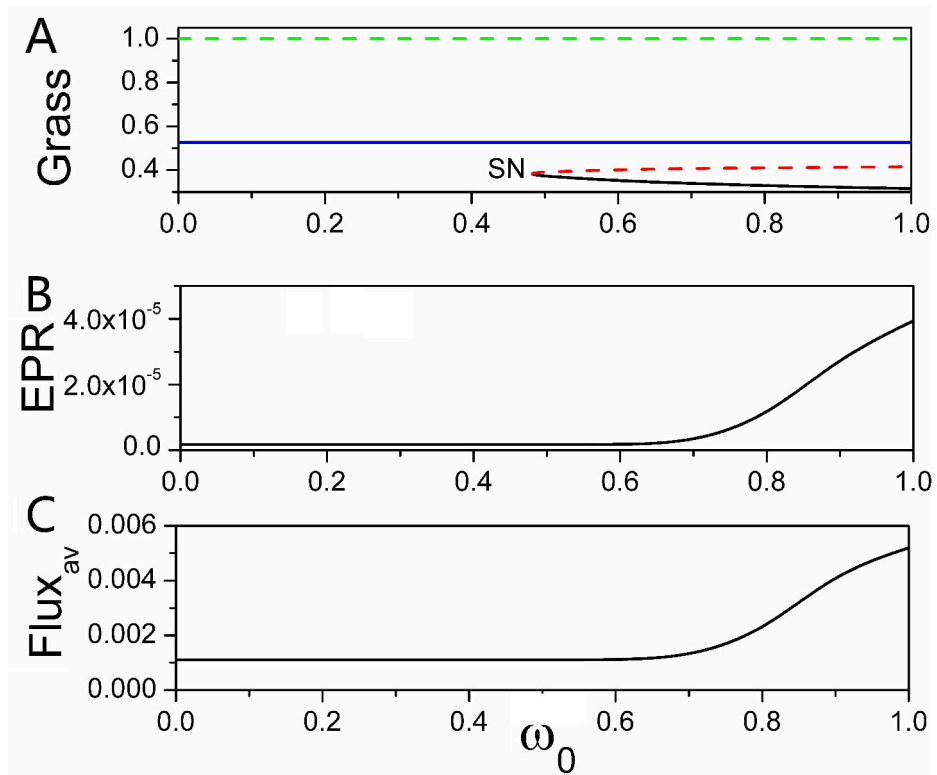

Fig. S28. A: The phase diagram versus  $\omega_0$ . B: The population entropy production rate versus  $\omega_0$ . C: The population average flux versus  $\omega_0$ .

271 Since the three variables satisfy the normalization condition  $G + S + T = 1$  ( $x_1 + x_2 + x_3 = 1$ ), the dimensionality of the  
 272 forest-savanna ecological system will reduce from a three-dimensional system with the fraction of grass coverage ( $G = x_1$ ),  
 273 savanna saplings ( $S = x_3$ ) and trees ( $T = x_2$ ) to a an effective two-dimensional system. The corresponding state space has the  
 274 shape of an isosceles triangle. Unfortunately, it is very difficult to solve a Hamilton-Jacobi equation in a isosceles triangle

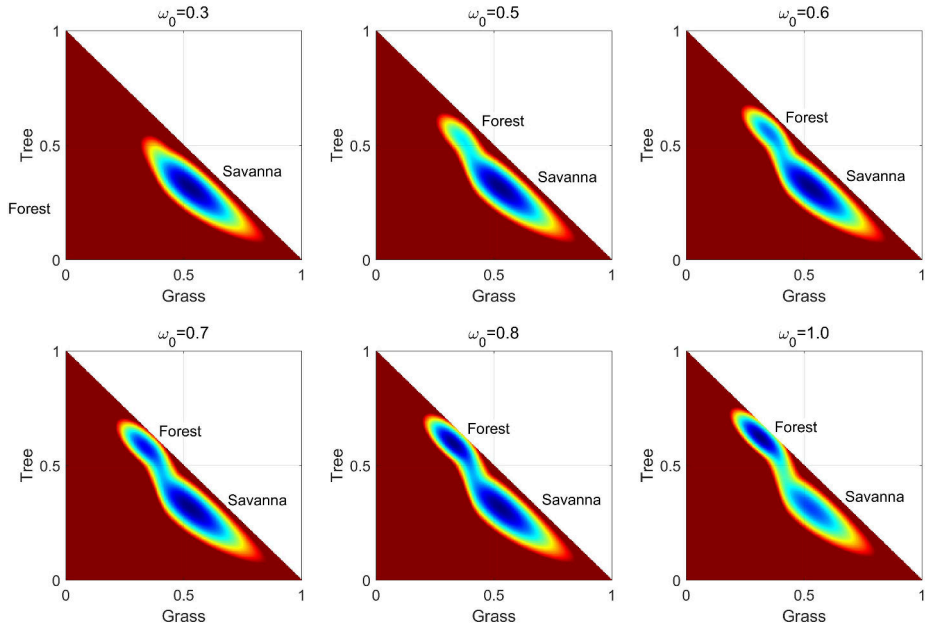

Fig. S29. The two-dimensional population-potential landscapes versus  $\omega_0$ .

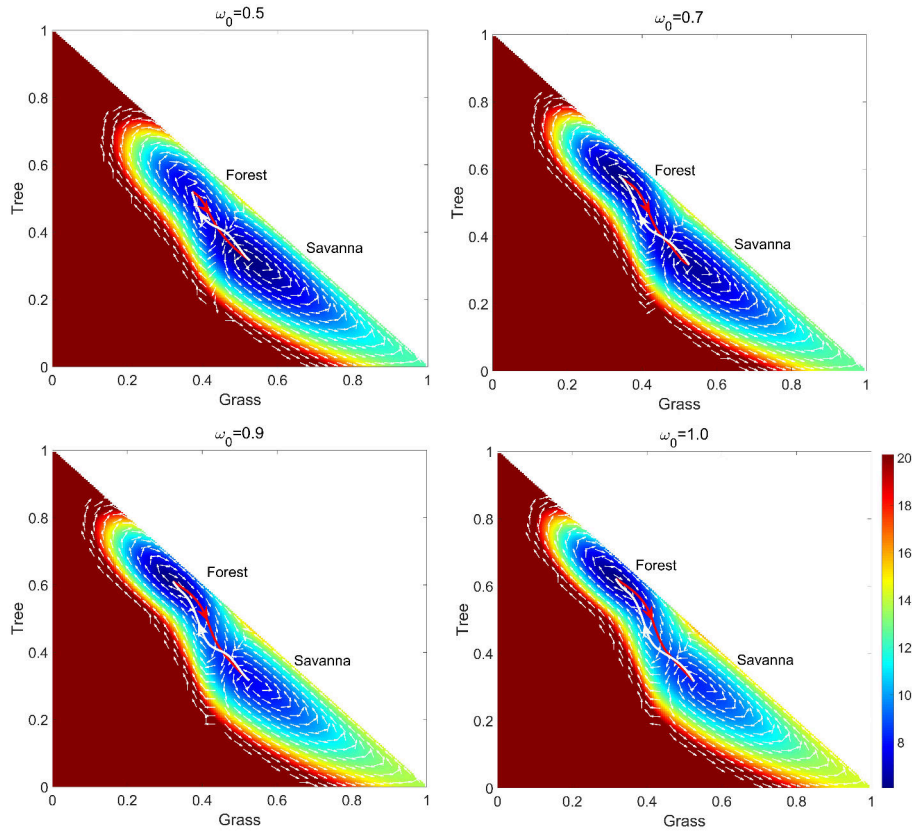

Fig. S30. The dominant population paths and fluxes on the population-potential landscape  $U$  with different  $\omega_0$ , at  $\beta = 0.38$ ,  $\theta_1 = 0.4$ ,  $\nu = 0.1$ ,  $\omega_1 = 0.2$ ,  $\mu = 0.2$ ,  $s_1 = 0.01$ ,  $D = 0.0005$ . The white lines represent the dominant population paths from the *Savanna* state to *Forest* state. The red lines represent the dominant population paths from the *Forest* state to *Savanna* state. The white arrows represent the steady-state probability fluxes.

275 and we can only numerical solve Hamilton-Jacobi equation in regular shapes, such as squares and rectangles with a diagonal  
 276 diffusion matrix (6–8). Our particular choice of diffusion coefficient matrix enables us to perform the coordinate transformation  
 277 from a special diffusion matrix in an isosceles triangle into a diagonal matrix in a square (8).

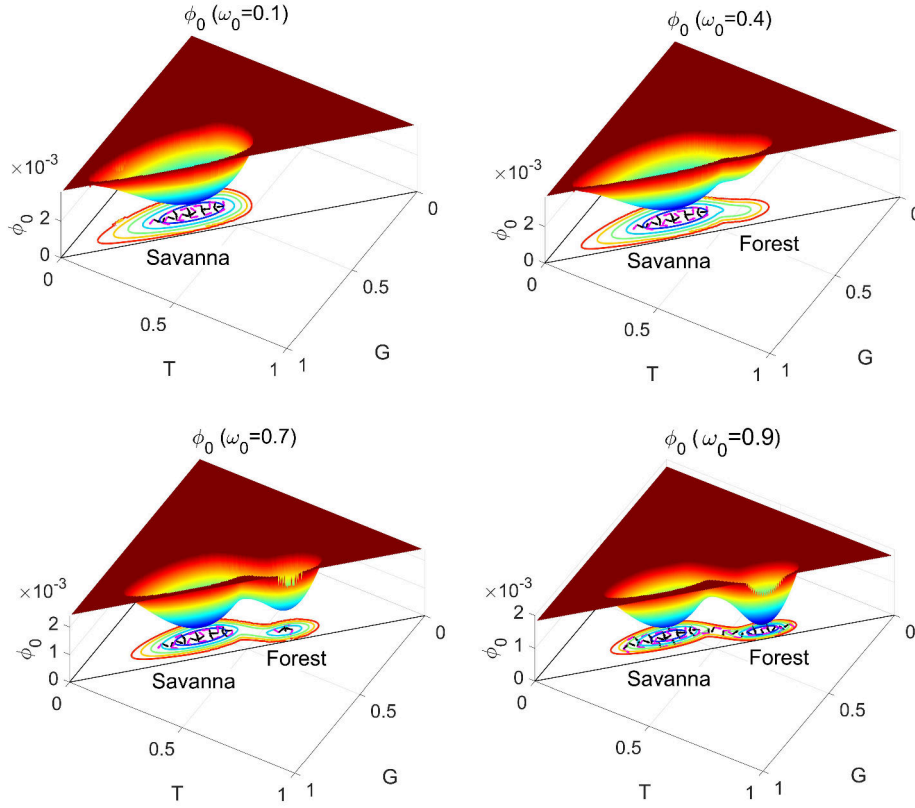

**Fig. S31.** The three-dimensional intrinsic potential landscape  $\phi_0$  for increasing  $\omega_0$ . The projection of the flux velocity (purple arrows) and the gradient of the intrinsic potential landscape  $-\nabla\phi_0$  (black arrows) on the intrinsic potential landscape  $\phi_0$  for increasing  $\omega_0$ .

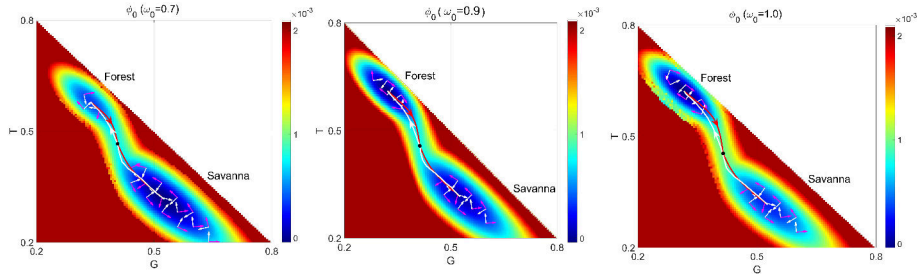

**Fig. S32.** The projection of the flux velocity (purple arrows) and the gradient of the intrinsic potential landscape  $-\nabla\phi_0$  (white arrows) on the intrinsic potential landscape  $\phi_0$  for increasing  $\omega_0$ . The dominant intrinsic paths on the intrinsic potential landscape  $\phi_0$  with different  $\omega_0$ . The white lines represent the dominant intrinsic paths from the *Savanna* state to *Forest* state. The red lines represent the dominant intrinsic paths from the *Forest* state to *Savanna* state.

278 The transformation of the original coordinate system in term of the probability of  $G, S, T$  is to obtain a Hamilton-Jacobi  
 279 equation with diagonal matrix. We set  $u_1 = x_1, u_2 = x_2/(1 - x_1)$ . Therefore, new coordinate variables are satisfied with  
 280  $0 \leq u_1, u_2 \leq 1$ . We show the original coordinate in Figure S43A while the new coordinate in Figure S43B. The different colored  
 281 lines in Figure S43A transform to the lines in Figure S43B (8). The grid points in Figure S43A transform to as the dot lines in  
 282 Figure S43B. Thus, the inverse transformation is  $x_1 = u_1, x_2 = u_2(1 - u_1)$ . And the nondiagonal elements of the new diffusion  
 283 matrix are equal to zero ( $D_{ij}^u = 0, i \neq j$ ). This transformation of the variables can lead to a new Hamilton-Jacobi equation  
 284 with the same form as the original one, but in diagonal form. Due to the form of the diffusion matrix, there are no mixed  
 285 second-order derivatives(8). Thus, the Hamilton-Jacobi equation with the given diffusion matrix in the isosceles triangle is  
 286 transformed to the diagonal diffusion matrix in a square and we can solve for the intrinsic potential via the new Hamilton-Jacobi  
 287 equation. Using the inverse transformation, we can obtain the intrinsic potential of the original Hamilton-Jacobi equation (8).  
 288 We use a numerical level set method with the Mitchell's level-set toolbox to solve the Hamilton-Jacobi equation for intrinsic  
 289 potential  $\phi_0$ (9).

290 Figure S44 shows the dominant intrinsic paths on the intrinsic landscape  $\phi_0$  with different  $\beta$ . The red lines are the dominant  
 291 intrinsic paths from the *Forest* state to *Savanna* state and the white lines are the dominant intrinsic paths from the *Savanna*  
 292 state to *Forest* state.



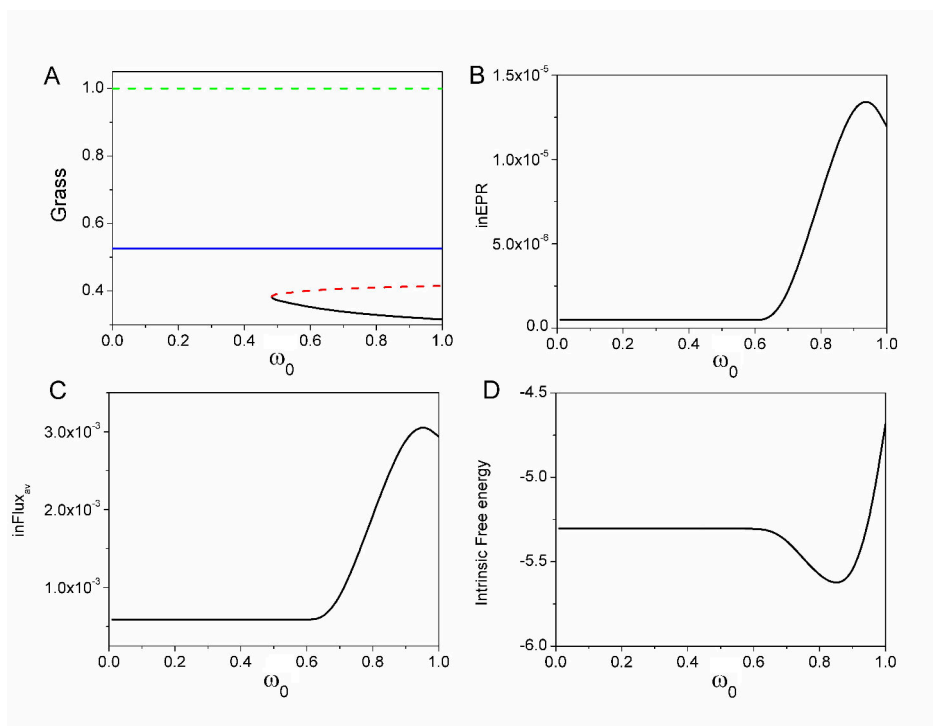

**Fig. S33.** A: The phase diagram versus  $\omega_0$ . B: The intrinsic entropy production rate versus  $\omega_0$ . C: The intrinsic average flux versus  $\omega_0$ . D: Intrinsic free energy versus  $\omega_0$ .

## References

- 293 1. NG Van Kampen, Stochastic processes in physics and chemistry. (Elsevier) Vol. 1, (1992).
- 294 2. A Terebus, C Liu, J Liang, Discrete and continuous models of probability flux of switching dynamics: Uncovering stochastic  
295 oscillations in a toggle-switch system. The Journal of Chemical Physics **151**, 185104 (2019).
- 296 3. A Terebus, C Liu, J Liang, Discrete flux and velocity fields of probability and their global maps in reaction systems.  
297 The Journal of Chemical Physics **149**, 185101 (2018).
- 298 4. Y Xu, R Gu, H Zhang, W Xu, J Duan, Stochastic bifurcations in a bistable Duffing–Van der Pol oscillator with colored  
299 noise. Physical Review E **83**, 056215 (2011).
- 300 5. SH Rice, Evolutionary theory: mathematical and conceptual foundations. (Sinauer Associates), (2004).
- 301 6. F Zhang, L Xu, K Zhang, E Wang, J Wang, The potential and flux landscape theory of evolution.  
302 The Journal of chemical physics **137**, 065102 (2012).
- 303 7. L Xu, F Zhang, K Zhang, E Wang, J Wang, The potential and flux landscape theory of ecology. PLoS One **9**, e86746  
304 (2014).
- 305 8. GJ Baxter, RA Blythe, AJ McKane, Exact solution of the multi-allelic diffusion model. Mathematical biosciences **209**,  
306 124–170 (2007).
- 307 9. IM Mitchell, The flexible, extensible and efficient toolbox of level set methods. Journal of Scientific Computing **35**, 300–329  
308 (2008).
- 309

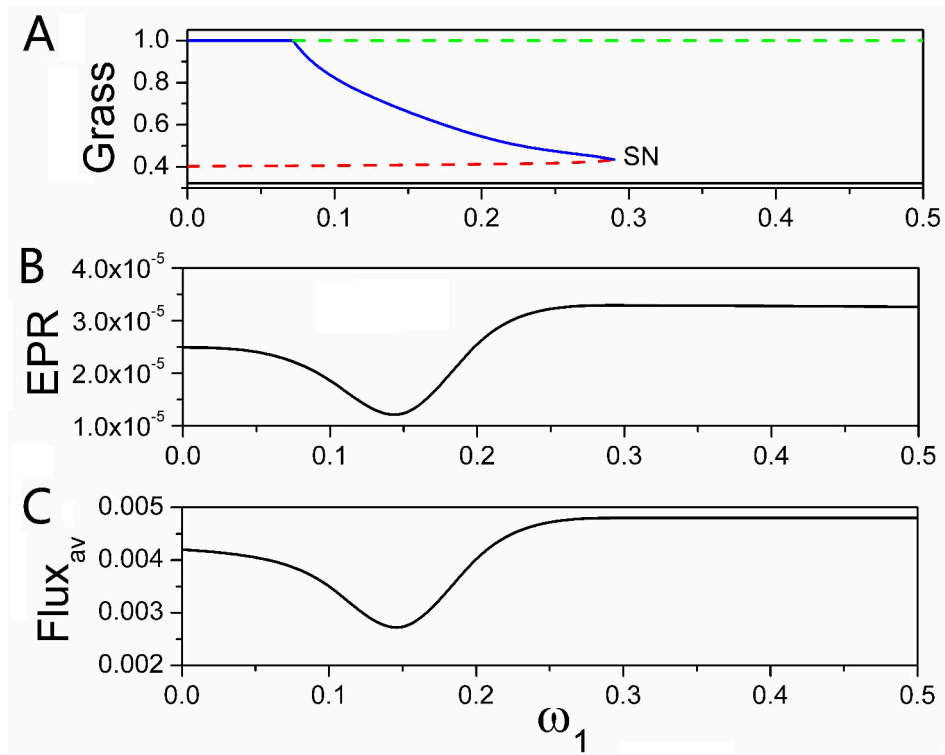

**Fig. S34.** A: The phase diagram versus  $\omega_1$ . B: The population entropy production rate versus  $\omega_1$ . C: The population average flux versus  $\omega_1$ .

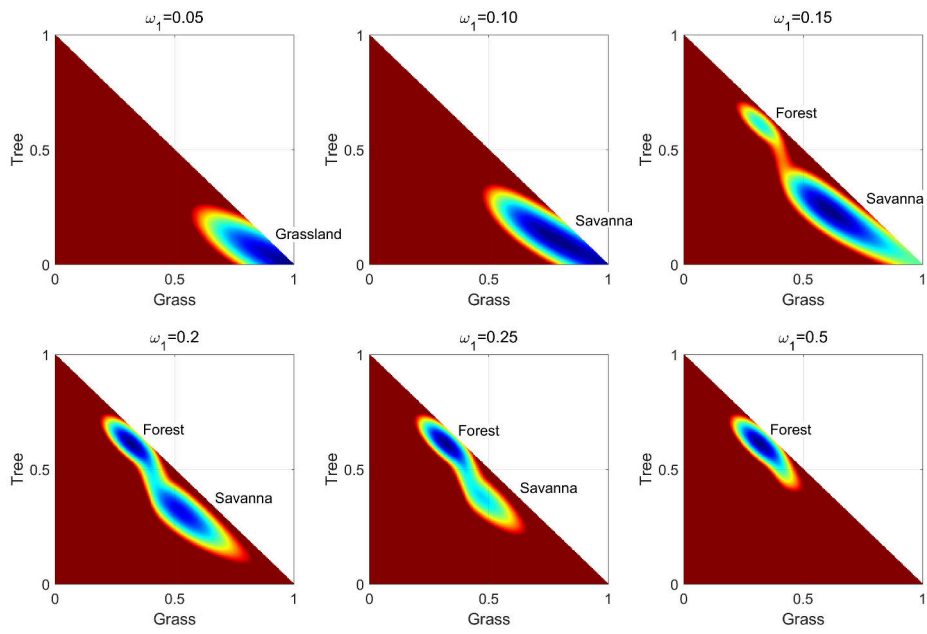

Fig. S35. The two-dimensional population-potential landscapes versus  $\omega_1$ .

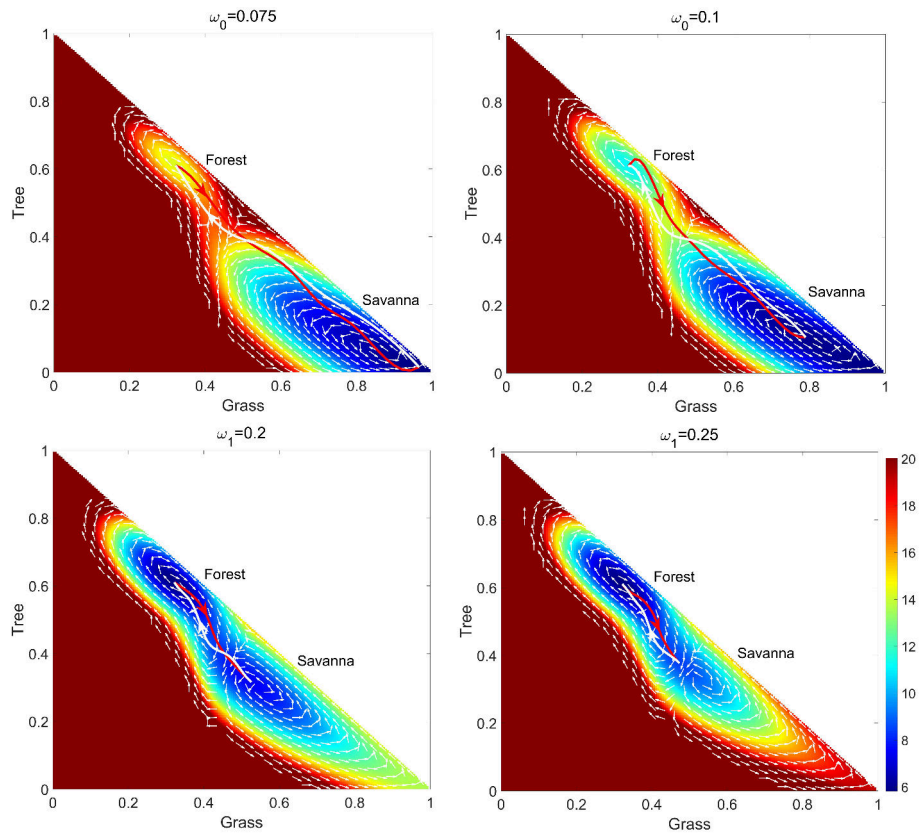

**Fig. S36.** The dominant population paths and fluxes on the population-potential landscape  $U$  with different  $\omega_1$ , at  $\beta = 0.38, \theta_1 = 0.4, \nu = 0.1, \omega_0 = 0.9, \mu = 0.2, s_1 = 0.01, D = 0.0005$ . The white lines represent the dominant population paths from the *Savanna* state to *Forest* state. The red lines represent the dominant population paths from the *Forest* state to *Savanna* state. The white arrows are the steady-state probability fluxes.

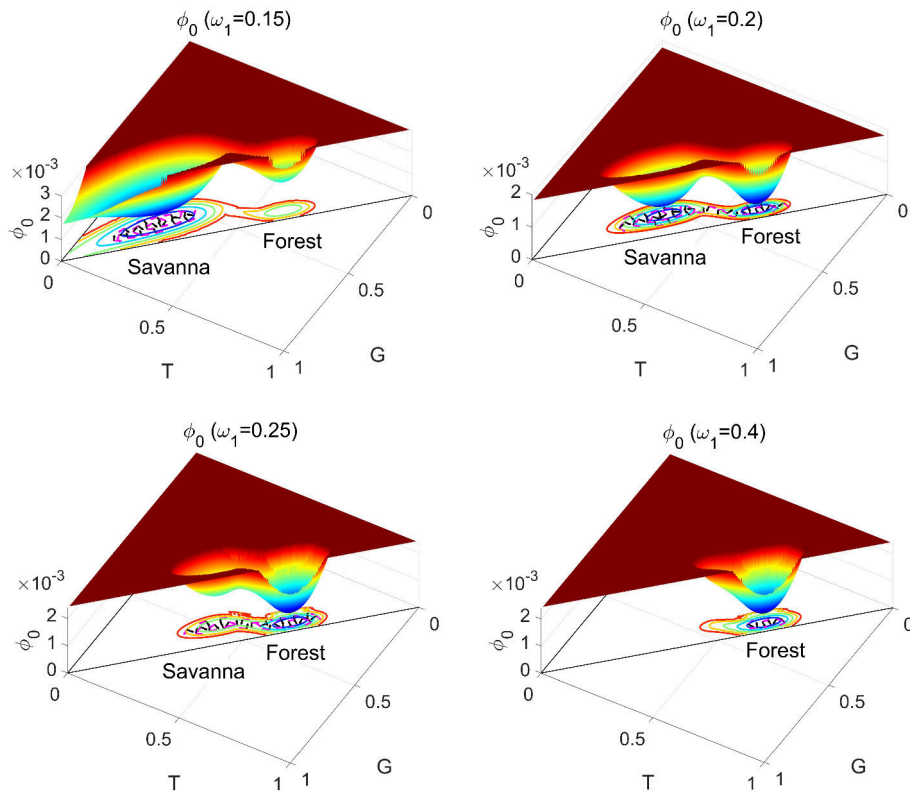

**Fig. S37.** The three-dimensional intrinsic potential landscape  $\phi_0$  for increasing  $\omega_1$ . The projection of the flux velocity (purple arrows) and the gradient of the intrinsic potential landscape  $-\nabla\phi_0$  (black arrows) on the intrinsic potential landscape  $\phi_0$ .

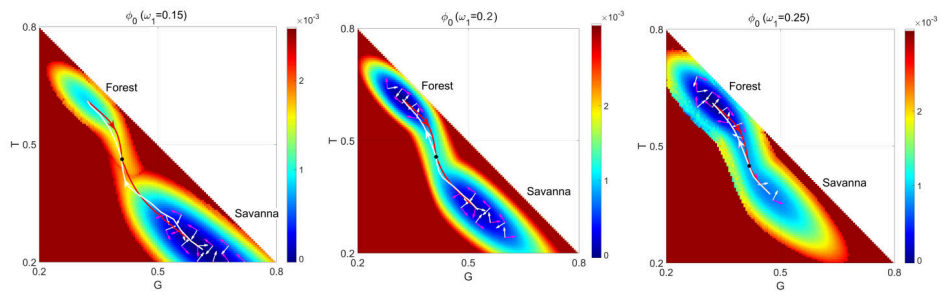

**Fig. S38.** The projection of the flux velocity (purple arrows) and the gradient of the intrinsic potential landscape  $-\nabla\phi_0$  (white arrows) on the intrinsic potential landscape  $\phi_0$  for increasing  $\omega_1$ . The dominant intrinsic paths on the intrinsic potential landscape  $\phi_0$  with different  $\omega_1$ . The white lines represent the dominant intrinsic paths from the *Savanna* state to *Forest* state. The red lines represent the dominant intrinsic paths from the *Forest* state to *Savanna* state.



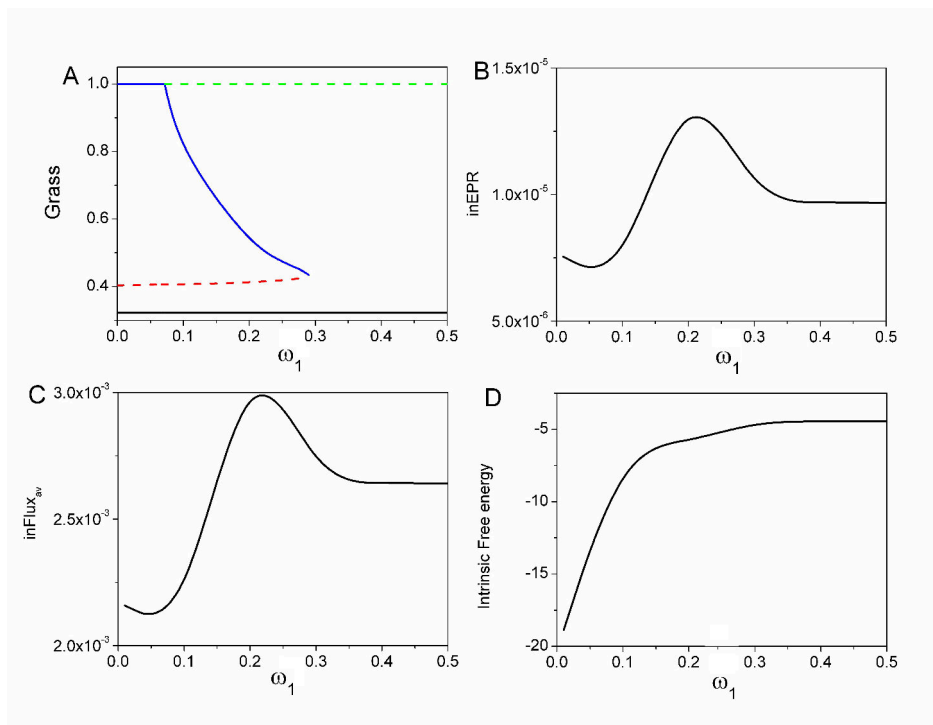

**Fig. S39.** A: The phase diagram versus  $\omega_1$ . B: The intrinsic entropy production rate versus  $\omega_1$ . C: The intrinsic average flux versus  $\omega_1$ . D: Intrinsic free energy versus  $\omega_1$ .

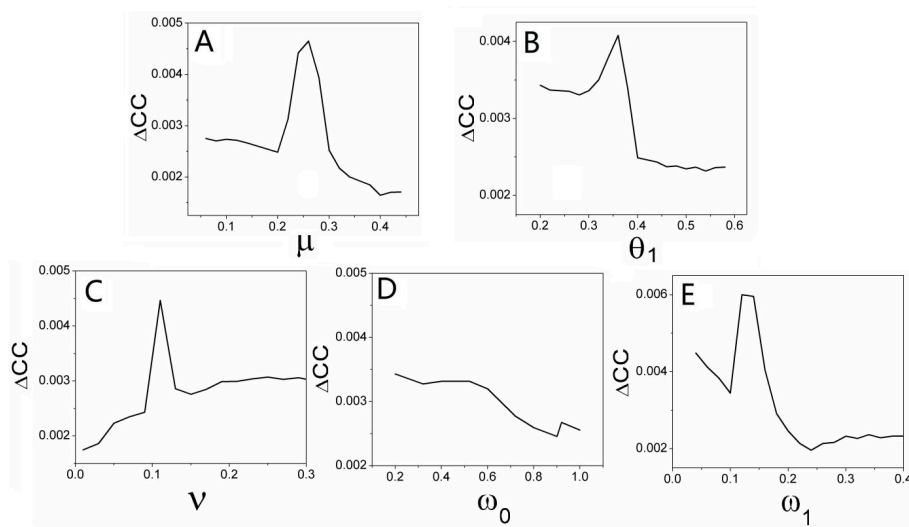

**Fig. S40.** The average change of the forward and backward in time cross correlation function  $\Delta CC$  as a function of different parameters. A:  $\mu$ , B:  $\theta_1$ , C:  $\nu$ , D:  $\omega_0$ , E:  $\omega_1$ .

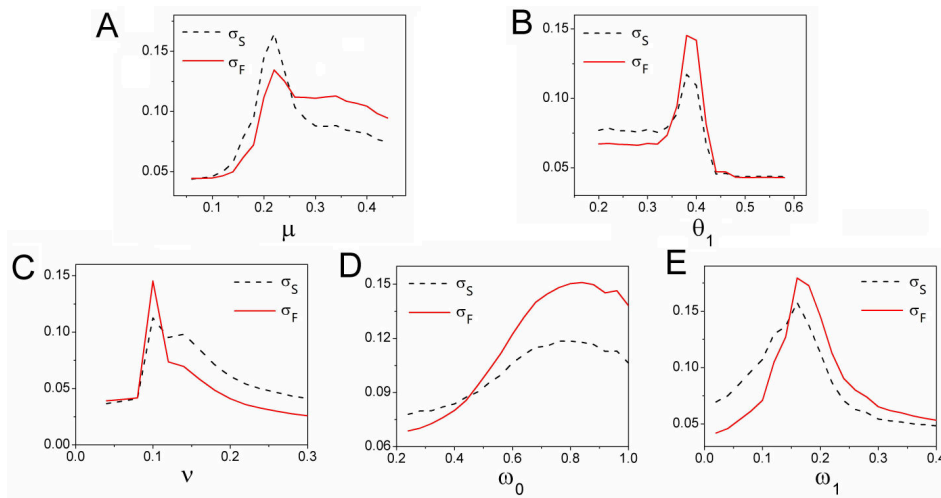

**Fig. S41.** The variances *Grass*  $\sigma_S$  and the variances *Tree*  $\sigma_F$  versus A:  $\mu$ , B:  $\theta_1$ , C:  $\nu$ , D:  $\omega_0$ , E:  $\omega_1$ .

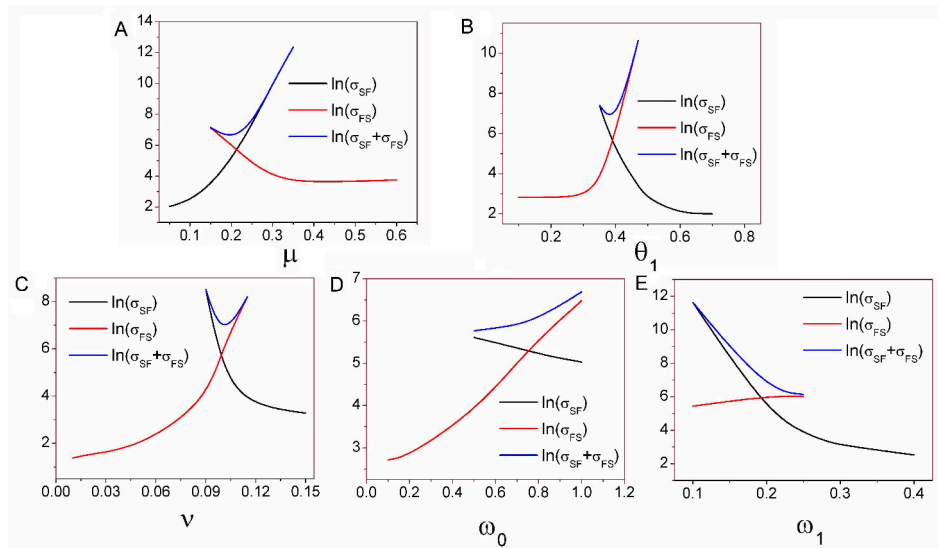

**Fig. S42.** The logarithms of the variances of the first passage time from *Savanna* to *Forest*  $\log(\sigma_{SF})$  and the first passage time from *Forest* to *Savanna*  $\log(\sigma_{FS})$ , and the logarithms of the sum of them  $\log(\sigma_{SF} + \sigma_{FS})$  with A:  $\mu$ , B:  $\theta_1$ , C:  $\nu$ , D:  $\omega_0$ , E:  $\omega_1$ .

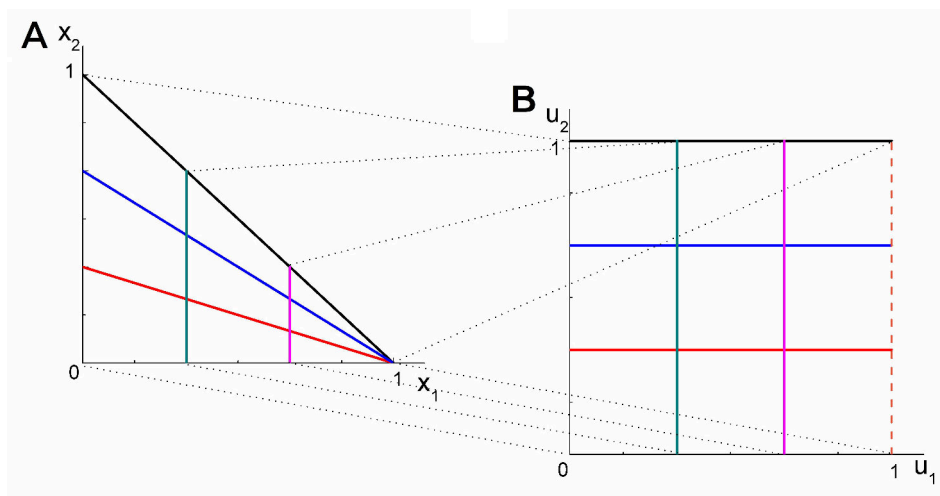

Fig. S43. Schematic representation of the transformation of the coordinates from  $x_1 - x_2$  plane to  $u_1 - u_2$  plane(8).

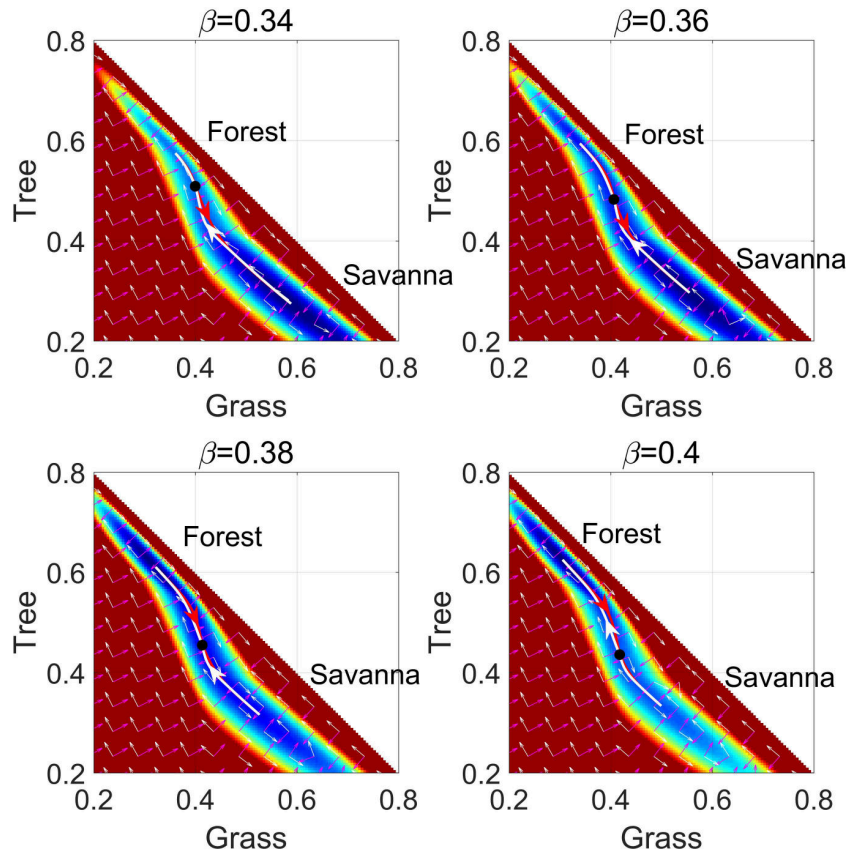

**Fig. S44.** The dominant intrinsic paths on the intrinsic potential landscape  $\phi_0$  with different  $\beta$  from Hamilton-Jacobi equation with a chosen diffusion matrix. The white lines represent the dominant intrinsic paths from the *Savanna* state to *Forest* state. The red lines represent the dominant intrinsic paths from the *Forest* state to *Savanna* state. White arrows represents the projection of the flux velocity and purple arrows represents the negative gradient of the intrinsic landscape  $-\nabla\phi_0$ .
